1 **Surface display of designer protein scaffolds on genome-reduced**

2 **strains of *Pseudomonas putida***

3  
4 by

5 Pavel Dvořák<sup>1\*</sup>, Edward A. Bayer<sup>2</sup>, and Víctor de Lorenzo<sup>3\*</sup>

6  
7 <sup>1</sup>*Department of Experimental Biology (Microbiology Section), Faculty of Science, Masaryk*  
8 *University, Kamenice 753/5, 62500, Brno, Czech Republic.*

9 <sup>2</sup>*Department of Biomolecular Sciences, The Weizmann Institute of Science, Rehovot 76100,*  
10 *Israel*

11 <sup>3</sup>*Systems and Synthetic Biology Program, Centro Nacional de Biotecnología CNB-CSIC,*  
12 *Cantoblanco, Darwin 3, 28049 Madrid, Spain.*

13  
14 **Keywords:** *Pseudomonas putida*, cellulosome, designer scaffoldin, surface display,  
15 synthetic biology

16  
17 \* Co-corresponding authors:

18 Prof. V. de Lorenzo

19 Systems and Synthetic Biology Program, Centro Nacional de Biotecnología (CNB-CSIC)

20 Darwin 3, Campus de Cantoblanco Madrid 28049, Spain

21 Phone: +34 91 585 4536, Fax: +34 91 585 4506, E-mail: [vdlorenzo@cnb.csic.es](mailto:vdlorenzo@cnb.csic.es)

22 Dr. Pavel Dvořák

23 Department of Experimental Biology (Section of Microbiology), Faculty of Science

24 Masaryk University, Kamenice 735/5, Brno 62500, Czech Republic

25 Phone: +420 549 493 396, E-mail: [pdvorak@sci.muni.cz](mailto:pdvorak@sci.muni.cz)

26

## 1 Abstract

2 The bacterium *Pseudomonas putida* KT2440 is gaining considerable interest as a microbial  
3 platform for biotechnological valorization of polymeric organic materials, such as waste  
4 lignocellulose or plastics. However, *P. putida* on its own cannot make much use of such  
5 complex substrates, mainly because it lacks an efficient extracellular depolymerizing  
6 apparatus. We seek to meet this challenge by adopting a recombinant cellulosome strategy for  
7 this attractive host. Here, we report an essential step in this endeavor – a display of designer  
8 enzyme-anchoring protein “scaffoldins”, encompassing cohesin binding domains from  
9 divergent cellulolytic bacterial species on the *P. putida* surface. Two *P. putida* chassis strains,  
10 EM42 and EM371, with streamlined genomes and substantial differences in the composition  
11 of the outer membrane were employed in this study. Scaffoldin variants were delivered to  
12 their surface with one of four tested autotransporter systems (Ag43 from *Escherichia coli*),  
13 and the efficient display was confirmed by extracellular attachment of chimeric  $\beta$ -glucosidase  
14 and fluorescent proteins. Our results highlight the importance of cell surface engineering for  
15 display of recombinant proteins in Gram-negative bacteria and pave the way towards designer  
16 cellulosome strategies, tailored for *P. putida*.

17

---

## 18 Introduction

19 Polymeric organic materials such as waste lignocellulose or plastics represent a potentially  
20 inexhaustible source of cheap carbon and energy for biotechnology and synthetic biology  
21 enterprises.<sup>1,2</sup> Adoption of these recalcitrant feedstocks for bioproduction of valuable  
22 chemicals nonetheless requires the employment of microbial hosts with a suite of properties  
23 that would allow them to perform complex biocatalytic conversions efficiently even under  
24 harsh conditions of industrial processes. Such microorganisms are currently not available but  
25 can be obtained by engineering suitable robust platform strains.

26 *Pseudomonas putida* KT2440, a popular Gram-negative bacterial workhorse, definitely  
27 fulfills some of the crucial criteria to become a host of choice for biotechnological upcycling  
28 of polymeric wastes. It has been recently engineered for utilization and valorization of several  
29 plant biomass-derived sugars,<sup>3–5</sup> lignin-born aromatic chemicals<sup>6,7</sup> or even products of  
30 synthetic plastic degradation.<sup>8</sup> It was also demonstrated that this bacterium can process

1 oligomeric carbohydrates<sup>4,9</sup> as well as co-utilize hexose and pentose sugars – glucose and  
2 xylose - and consume simultaneously glucose and an aromatic substrate with a lack of  
3 diauxia.<sup>4,10</sup> These and other characteristics including safety status,<sup>11</sup> rapid growth and low  
4 nutritional demand,<sup>12</sup> considerable resistance to inhibitory chemicals,<sup>13,14</sup> its employment in  
5 large-scale fermentations for production of value-added chemicals,<sup>15</sup> or its compliance to  
6 genetic manipulations and the available palette of engineering tools,<sup>16–18</sup> make *P. putida* an  
7 attractive candidate for the demanding biotechnological task sketched above. However, *P.*  
8 *putida*, same as the majority of other domesticated microbial platforms, lacks efficient  
9 extracellular depolymerizing apparatus and cannot degrade complex recalcitrant substrates  
10 alone.

11 The most efficient natural polymer degraders known to date, cellulolytic bacteria such as  
12 *Clostridium thermocellum*, display on their surface cellulosomes – remarkable nanomachines  
13 composed of scaffoldin proteins that attach and orchestrate multiple carbohydrate-active  
14 enzymes on the cell surface.<sup>19</sup> The binding of cellulases to scaffoldins is mediated by strong  
15 ( $K_D \sim 10^{-9} - 10^{-10}$  M) highly specific non-covalent interactions between cohesin and dockerin  
16 binding domains.<sup>20</sup> Extensive H-bond networks provide cohesin-dockerin pairs the firmness  
17 which reaches half of the mechanical rupture strength of a covalent bond and surpasses  
18 antigen-antibody binding.<sup>21,22</sup> Concerted action of dockerin-tagged cellulases clustered on the  
19 cell surface through interactions with cohesins in scaffoldin proteins can enhance cellulose  
20 degradation up to 50-fold when compared with free enzymes.<sup>23</sup>

21 Natural cellulosome producers (e.g., *C. thermocellum*, *Bacteroides cellulosolvens*, *Acetivibrio*  
22 *cellulolyticus*) are often difficult to genetically manipulate or cultivate, and their cellulosomes  
23 are large and complicated.<sup>24</sup> Hence, smaller synthetic *designer cellulosomes* or  
24 *minicellulosomes* have been assembled either *in vitro* using purified components<sup>25–27</sup> or *in*  
25 *vivo* on the surface of a suitable microbial host.<sup>28–32</sup> A fundamental prerequisite for successful  
26 minicellulosome assembly is a display of scaffoldin proteins on the surface of a target host.  
27 Truncated forms of native scaffoldins or designer hybrid scaffoldins with cohesin domains  
28 from diverse cellulolytic organisms were delivered to the cell surface of a recombinant  
29 *Saccharomyces cerevisiae*,<sup>28,33</sup> *Bacillus subtilis*,<sup>31</sup> *Clostridium acetobutylicum*,<sup>34</sup>  
30 *Lactobacillus plantarum*<sup>32</sup> or *Lactococcus lactis*.<sup>35</sup> However, efficient expression and  
31 secretion of cellulosome components in a phylogenetically distant Gram-negative host with

1 different codon usage, G+C content in a genome, a complicated two-layer structure of cell  
2 wall, and crowded cell surface remains to be very challenging. Not surprisingly, surface  
3 display of scaffoldins and subsequent *in vivo* assembly of a designer cellulosome of any size  
4 has not yet been reported in a biotechnologically relevant Gram-negative bacterium. Thus far,  
5 display or secretion of individual depolymerizing enzymes has been achieved in engineered  
6 *E. coli*, allowing it to grow on cellooligosaccharides or produce a limited quantity of biofuels  
7 from plant biomass.<sup>36-39</sup> In the case of *P. putida*, single cellulases from *Ruminiclostridium*  
8 *thermocellum* and hemicellulases from *Bacillus subtilis* were displayed on the surface of  
9 recombinant strains mixed to form designer co-cultures of resting cells.<sup>40,41</sup> The joint  
10 activities of these enzymes in cell suspensions of high cell densities resulted in the production  
11 of small quantities of glucose<sup>40</sup> or xylose<sup>41</sup> from filter paper or arabinoxylan, respectively,  
12 which were nonetheless insufficient to support the growth of the host bacterium. Adoption of  
13 the designer cellulosome approach can result in more efficient saccharification of  
14 (hemi)cellulose when compared to the strategy which utilizes cellulases displayed separately  
15 on several strains.<sup>42</sup> However, to test that hypothesis also in a selected Gram-negative  
16 bacterial host, an efficient display of scaffoldins for docking of cellulases on its surface must  
17 first be achieved.

18 In this study, we aimed to display structurally distinct variants of a designer miniscaffoldin on  
19 the surface of recently introduced genome-reduced *P. putida* strains designated EM42 and  
20 EM371 (**Fig 1 and Fig. S1**). The two strains were adopted mainly due to the substantial  
21 differences in presence of diverse outer membrane structures and complexity of the bacterial  
22 surface which can impose structural constraints for displayed proteins.<sup>43</sup> Strain EM42  
23 possesses eleven non-adjacent genomic deletions (300 genes, ~ 4.3 % of the whole genome)  
24 that were shown to improve expression of heterologous genes and enhanced biotechnological  
25 potential of this *P. putida* KT2440 derivative.<sup>4,44,45</sup> Except for missing flagellum, the cell  
26 surface of *P. putida* EM42 resembles that of the wild-type strain KT2440. In the strain  
27 EM371, on contrary, most of the non-essential outer membrane structures that are used by  
28 bacteria to coordinate motion (flagella) or to develop biofilms and interact with their  
29 surroundings (*e.g.*, fimbriae, pili, curli, adhesins, exopolysaccharides, lipopolysaccharides)  
30 were eliminated (230 genes, ~ 4.7 % of the entire genome).<sup>46</sup> The “shaved” surface endowed  
31 *P. putida* EM371 with properties potentially beneficial for extracellular recombinant protein

1 production and facilitated downstream processing.<sup>46</sup> Here, expression and display of  
2 scaffoldin variants on the surface of EM42 and EM371, *via* one of the four tested  
3 autotransporter systems, allowed: (i) addressing important questions on how does the  
4 character of secreted molecules and cellular exterior contribute to cohesin-dockerin  
5 interactions and (ii) comparison of the capability of the two biotechnologically relevant *P.*  
6 *putida* strains to become Gram-negative bacterial platforms for *in vivo* assembly of surface-  
7 exposed designer depolymerizing nanomachines.

8

## 9 **Results**

10 ***Preparation of cohesin-containing scaffoldin variants and dockerin-tagged chimeric***  
11 ***proteins.*** Scaffoldin Scaf19L assembled by Vazana and co-workers<sup>47</sup> was initially adopted for  
12 this study (**Fig. 2a, Supplementary sequences in SI**). This chimaeric construct contains the  
13 N-terminal carbohydrate-binding module (CBM) from *Clostridium thermocellum* and three  
14 cohesin domains, designated here AcCoh, CtCoh, and BcCoh, from *Acetivibrio cellulolyticus*,  
15 *C. thermocellum*, and *Bacteroides cellulosolvens*, respectively (for details see Material and  
16 methods section). The cohesins and CBM are interconnected with 27 – 35 amino acid (aa)  
17 long flexible linkers, which were shown to have a positive effect on the overall activity of a  
18 synthetic minicellulosome assembled *in vitro*.<sup>47</sup> The scaffoldin gene was subcloned into the  
19 pSEVA238 plasmid with inducible XylS/Pm expression system<sup>48</sup>, and the construct was  
20 inserted into *Pseudomonas putida* EM42. However, induction of the gene expression resulted  
21 in reduced host's fitness (**Fig. S2a**). Western blot analysis of the soluble and insoluble  
22 fractions of the cell lysate revealed limited Scaf19L solubility and its susceptibility to  
23 proteolytic cleavage (**Fig. S2b**). We argued that these problems could be caused by a  
24 discrepancy between the mean GC content (38 %) and codon distribution in the chimeric gene  
25 and in the genome of the host organism (mean GC content in *P. putida* genome is 62 %<sup>49</sup>).  
26 The codon adaptation index (CAI), calculated for *scaf19L* gene and *P. putida* KT2440 host  
27 using the on-line tool JCat<sup>50</sup>, was very low (0.10; where CAI of 1.0 signifies the best match),  
28 which indicated that gene toxicity could indeed have reflected codon bias. Hence, the *scaf19L*  
29 gene was synthesized and codon optimized for expression in *P. putida*. Heterologous  
30 expression of the resultant optimized gene *scaf19LKT* with increased GC content (57 %) had  
31 no negative effect on *P. putida* EM42 growth (**Fig. S2a**). Most of the Scaf19LKT protein was

1 produced in a soluble form (>75 % compared to < 50 % before optimization), and proteolysis  
2 was not observed (**Fig. S2b**). These results show that GC content and codon usage are two  
3 key sequence features that must be taken into consideration for design of synthetic  
4 cellulosome components from phylogenetically distant species to be expressed in *P. putida*.

5 The functionality of cohesins in Scaf19LKT produced in *P. putida* EM42 was then analyzed  
6 using an enzyme-linked immunosorbent assay (ELISA)-based binding assay.<sup>47</sup> The assay was  
7 based on binding of recombinant variants of *Geobacillus sp.* endo-1,4- $\beta$ -xylanase fused to  
8 dockerins from *A. cellulolyticus*, *C. thermocellum*, or *B. cellulosolvans* (named here AcDoc,  
9 CtDoc, or BcDoc, respectively) to respective cohesins in Scaf19LKT molecules in *P. putida*  
10 EM42 cell-free extract and subsequent detection of the assembled complexes with anti-  
11 xylanase antibody. **Figure 2b** shows that all three cohesins in Scaf19LKT produced in *P.*  
12 *putida* were able to bind their respective dockerins but not with equal efficiency. AcCoh-  
13 AcDoc and CtCoh-CtDoc pairs provided twice as much signal as the BcCoh-BcDoc  
14 combination, which signified a possible tighter binding of the former two pairs. We therefore  
15 selected these pairs for experiments in the current study. Three truncated variants of  
16 *scaf19LKT* gene encoding scaffoldins AcCoh, CtCoh, and AcCoh-CtCoh with a single  
17 cohesin or with two cohesins were prepared for surface display on *P. putida* EM42 and  
18 EM371 strains (**Fig. 2a**).

19 We then aimed at the assembly of dockerin-tagged reporter proteins that could be employed  
20 in a rapid robust assay for the detection of displayed scaffoldins on the surface of the target  
21 host cells. Displayed cohesins can be detected and quantified by ELISA-based protocols<sup>32,47</sup>  
22 or by assays with dockerin-tagged enzymes, such as  $\beta$ -glucuronidase.<sup>35</sup> The latter approach  
23 was adopted in this study.  $\beta$ -Glucosidase (EC 3.2. 1.21) BglC from *Thermobifida fusca* was  
24 previously shown to be functionally expressed in *P. putida* EM42 up to 30 % of the total  
25 soluble protein.<sup>4</sup> Measurement of its hydrolytic activity with synthetic *p*-nitrophenyl- $\beta$ -D-  
26 glucopyranoside (pNPG) substrate is simple and fast. We modified this enzyme by fusing it  
27 on its C terminus with AcDoc or CtDoc dockerin (**Fig. 2a**). Two chimeras and wild-type  
28 BglC with a polyhistidine tag were produced in *P. putida* EM42, purified by immobilized  
29 metal affinity chromatography (**Fig. S3a – S3c**), and specific activities of the three enzymes  
30 with pNPG were determined. As shown in **Figure 2b**, enzyme fusion to neither of the two  
31 dockerins reduced the activity substantially. Activities of BglC-AcDoc and BglC-CtDoc

1 reached 74 % and 83 % of the wild-type activity, respectively. The lower performance of  
2 BglC-AcDoc compared to BglC-CtDoc can be attributed to the lower expression and  
3 consequent also lower purity of this chimera (70 % and 85 % protein purity of BglC-AcDoc  
4 and BglC-CtDoc, respectively, was estimated from sodium dodecyl sulfate (SDS)  
5 polyacrylamide gels using ImageJ Gel Densitometry Tool, **Fig. S3b and S3c**). Dockerin-  
6 tagged variants of cyan fluorescent protein mCerulean and monomeric superfolder green  
7 fluorescent protein, abbreviated here as CFP-AcDoc and GFP-CtDoc, respectively, were  
8 prepared according to BglC chimeras for spectroscopic and microscopic confirmation of  
9 displayed scaffoldins (**Fig. 2a**). Chimeric fluorophores were produced in *Escherichia coli*  
10 BL21-Gold (DE3) and purified by affinity chromatography (**Fig. S3D and S3E**).

11  
12 ***Selection of an optimal autotransporter system for display of scaffoldins on the surface of***  
13 ***P. putida EM42 and EM371 strains.*** Monomeric type V secretion pathway proteins known  
14 as autotransporters have been extensively used for decorating surfaces of Gram-negative  
15 bacteria with recombinant proteins.<sup>51,52</sup> They became popular mainly due to their simplicity (a  
16 single gene encodes all three domains needed for display – a signal peptide, a surface-exposed  
17 passenger, and a transmembrane  $\beta$ -domain), high display efficiencies reaching in certain cases  
18  $10^4$  -  $10^5$  enzyme molecules per cell, and relatively low toxicity of recombinant variants  
19 towards a bacterial host.<sup>53,54</sup> Three autotransporters, namely EhaA from enterohemorrhagic *E.*  
20 *coli*,<sup>55</sup> EstP from *P. putida*,<sup>56</sup> and immunoglobulin A (IgA) protease from *Neisseria*  
21 *gonorrhoeae*<sup>57</sup> were used with some success for a passenger export in the KT2440 strain or its  
22 derivative, but, in general, the reports on recombinant protein surface display in this host are  
23 scarce.

24 It is often highlighted in the scientific literature that the accurate prediction of a secretion  
25 system, functioning with a given passenger protein in a selected bacterial host, is unlikely.<sup>58</sup>  
26 Hence, it is desirable to test at least several candidate systems. Here, we sought to evaluate  
27 four different autotransporters for display of designer scaffoldins in *P. putida*. Three  
28 previously constructed systems, including translocator domains ( $\beta$ -barrels and  $\alpha$ -helix linkers)  
29 of the IgA protease from *N. gonorrhoeae*,<sup>59</sup> antigen 43 (Ag43) from *E. coli*,<sup>38,60</sup> and EaeA  
30 intimin (Int, inverse autotransporter) from *E. coli*<sup>61,62</sup> were adopted for this study (**Fig. 3a,**  
31 **Supplementary Table S1, Material and methods**). Moreover, *P. putida* EstP esterase

1 (PP\_0418) translocator sequence, encoding the  $\beta$ -barrel domain with a spanning  $\alpha$ -helical  
2 linker complemented by a synthetic multi-cloning site and a native signal peptide sequence,  
3 was synthesized and added to the list for testing. IgA and intimin were already available in  
4 our laboratory, cloned in pSEVA238 plasmid. Ag43 and EstP autotransporter genes were  
5 subcloned into this vector from a provided<sup>38</sup> and a delivery plasmid, respectively. The EstP  
6 autotransporter was nonetheless soon excluded from the list, because its expression in *P.*  
7 *putida* EM42 appeared to be extremely toxic for the host (**Fig. S4**). Such a strong toxic effect  
8 might be attributed to the burden caused by overproduction of the native protein with efficient  
9 secretion signal and subsequent distortion of the cell membrane due to the high number of  
10 integrating  $\beta$ -barrels.<sup>63</sup> Indeed, we observed formation of flocks in the culture after induction,  
11 which is a common stress response mechanism, observed, *e.g.*, in cells with overexpressed  
12 porins or other membrane proteins.<sup>5,64</sup> Overproduced autotransporter molecules can also  
13 exhaust secretion machinery – namely Sec and BAM systems - required for the export of  
14 proteins necessary for cell growth and maintenance.<sup>51,65</sup> Induction of expression of the  
15 remaining three autotransporters had no or negligible effect on the host's viability (**Fig. S4**).  
16 All these systems were therefore selected for further testing.

17 In the next step, the codon-optimized gene encoding CtCoh was subcloned into the polylinker  
18 of *igAAT*, *ag43AT*, and *intAT*, and the three autotransporters were tested for display of the  
19 single-cohesin scaffoldin of the theoretical molecular weight of 16.2 kDa on the surface of  
20 EM42 and EM371 strains. Cells displaying scaffoldin were added with an excess of purified  
21 BglC-CtDoc ( $\sim 1.0 \times 10^5$  molecules per cell, the value was determined as described in the  
22 Materials and methods section), washed, and their  $\beta$ -glucosidase activity was determined by  
23 measuring the end-point absorbance of the reaction product *p*-nitrophenol released after  
24 hydrolysis of the pNPG substrate (**Fig. 3b**). The absorbance of the supernatant fluids from the  
25 reactions with whole cells was related to the absorbance of the mixture with purified BglC-  
26 CtDoc, which served as a positive control. An obvious advantage of such an approach is that  
27 all measured activity can be attributed only to the chimeric enzyme molecules attached from  
28 outside of the surface of the intact cells that passed cycles of centrifugation and washing. This  
29 feature is especially valuable when considering the fact that whole-cell ELISA and proteinase  
30 accessibility assays, frequently used to evaluate the efficiency of recombinant protein display,  
31 are prone to false-positive results.<sup>54,66</sup>



1 **Figure 3b** reveals that only the cells expressing Ag43 autotransporter showed high  $\beta$ -  
2 glucosidase activity, which, in the case of the EM371 recombinant, reached the level of the  
3 pure enzyme control. Some activity was also detected with EM371 cells displaying scaffoldin  
4 *via* intimin, but their EM42 counterparts were not able to attach dockerin-tagged BglC to their  
5 surface. Absorbance measured in supernatant fractions from reactions with the EM42  
6 pSEVA238\_ *intAT-CtCoh* recombinant did not surpass that of the negative controls (**Fig. 3b**).  
7 The same was also true for both recombinants (either EM42 or EM371) expressing *igAAT*,  
8 which suggests that this autotransporter was the least efficient in CtCoh display out of the  
9 three tested candidates. SDS polyacrylamide gel electrophoresis (SDS-PAGE) and western  
10 blot analysis of the cell lysates (**Fig. S5a and S5b**) confirmed the good expression of the  
11 *ag43AT-ctCoh* gene in both EM42 and EM371 recombinants. The chimera comprised around  
12 3 % of the total cellular protein, as determined using GS-800 Calibrated Densitometer (Bio-  
13 Rad). In contrast, expression of *intAT-ctCoh* was not detected on SDS-PAGE gel in either of  
14 the two lysates, and only a very pale barely detectable band was identified among the blotted  
15 proteins of the EM371 recombinant (**Fig. S5a and S5b**). Hence, the malfunctioning of this  
16 autotransporter system in the current study can be attributed to the poor expression of the  
17 construct. The same conclusion cannot be made for IgAAT-CtCoh because its production was  
18 detectable in EM42 and EM371 lysates, both on the SDS-PAGE gel and on the blotting  
19 membrane. However, no signal was seen with whole pre-induced EM42 and EM371 cells  
20 bearing the *igAAT-ctCoh* gene after their incubation with HRP-conjugated anti-6xHis tag  
21 antibody during the dot blot analysis (**Fig. S5c**). Hence, one possible explanation of the  
22 IgAAT-CtCoh malfunctioning is that the chimera was expressed, but it was not functionally  
23 displayed on the *P. putida* surface, perhaps due to improper folding during its transport and  
24 maturation. It is worth noting that *P. putida*, empowered with the IgA translocator construct  
25 identical to the one used here, was able to secrete detectable quantities of metallothioneins or  
26 eukaryotic leucine zippers in the former works of Valls et al.<sup>67</sup> and Martínez-García and co-  
27 workers, respectively. Such discrepancy supports the repeatedly certified observation that the  
28 ability of a certain autotransporter to export a passenger of choice in a given host bacterium  
29 cannot be predicted with confidence prior to experimental verification.<sup>54,58</sup>

30 Dot blot analysis of whole pre-induced cells also confirmed the display of CtCoh *via* the  
31 Ag43 autotransporter in the EM371 strain (**Fig. S5c**). None of the EM42 strains, including

1 EM42 with the Ag43AT-CtCoh construct, showed a luminescence signal. We hypothesize  
2 that this could be ascribed to the location of the 6xHis tag between the CtCoh and Ag43AT  
3 molecules and its poor accessibility for antibody on the crowded surface of the EM42 cells.  
4 Taken together, the results discussed above identified Ag43 as a promising secretion system  
5 for surface display of cohesin binding domains in *P. putida*.

6 Native Ag43 (Uniprot ID: P39180) possesses an N-terminal signal peptide (aa 0-52), a  
7 surface-exposed N-proximal  $\beta$ -helical  $\alpha$  passenger domain (aa 53-551) which is responsible  
8 for an autoaggregation phenotype in *E. coli*, and a C-terminal  $\beta$ -barrel domain (aa 552-1039)  
9 whose substantial part, except for an autochaperone domain that facilitates folding of the  
10 passenger domain, is buried in the outer membrane.<sup>68</sup> Under normal circumstances, the  
11  $\alpha$  domain is cleaved during the secretion process by an internal protease motif and remains  
12 attached to the cell surface by noncovalent interactions that can be disrupted, *e.g.*, by heat  
13 treatment or osmotic shock.<sup>69</sup> The Ag43 autotransporter employed in this study lacks the  
14 whole  $\alpha$  domain, including the aspartyl protease active site which was removed and  
15 substituted with a polylinker for cloning of a passenger of choice.<sup>38</sup> The passenger protein  
16 thus remains covalently attached to the cell surface.

17

18 ***Binding of dockerin-tagged  $\beta$ -glucosidase and fluorescent proteins on *P. putida* EM42 and***  
19 ***EM371 cells displaying scaffoldin variants.*** Cellulase BglC-CtDoc was successfully attached  
20 to *P. putida* cells expressing Ag43 autotransporter with a single-cohesin scaffoldin. But how  
21 is such directed interaction on bacterial surface influenced by the character and size of the  
22 displayed scaffoldin? And how does the character of a host cell's exterior contribute to such  
23 bonding? We aimed to answer these questions in the following part of our study. Genes  
24 encoding two remaining scaffoldin variants – single-cohesin AcCoh (theoretical Mw=16.5  
25 kDa) and two-cohesin AcCoh-CtCoh (theoretical Mw=34.6 kDa) – were subcloned separately  
26 into the polylinker of *ag43AT* in the pSEVA238 vector, and the resulting constructs were  
27 transferred to “hairy” EM42 and “naked” EM371 cells with preserved and eliminated outer  
28 membrane structures, respectively. Surface display of the structurally distinct AcCoh, CtCoh,  
29 and AcCoh-CtCoh scaffoldins on the *P. putida* recombinants was evaluated by attachment of  
30 dockerin-tagged  $\beta$ -glucosidase variants BglC-AcDoc and BglC-CtDoc and chimeric  
31 fluorophores CFP-AcDoc and GFP-CtDoc (**Fig. 4**). All purified recombinant proteins were

1 added to the cells in high excess ( $\sim 1.0 \times 10^5$   $\beta$ -glucosidase and  $\sim 1.8 \times 10^5$  fluorophore molecules  
2 per cell) to secure saturation of cohesin domains on the surface with the respective dockerins.

3 Whole-cell activities of  $\beta$ -glucosidase were quantitatively determined in defined time  
4 intervals and related to the activity of the corresponding purified recombinant enzyme (**Fig.**  
5 **4a and 4b, Material and methods**). Fluorescence of *P. putida* cells with surface-attached  
6 CFP or GFP was measured in microtiter plate format (**Fig. 4c and 4d**). The results confirmed  
7 that both cohesin domains were accessible on the cell surface and functional in binding their  
8 respective dockerins. Similar trends in the binding efficiency of dockerin-tagged proteins to  
9 the cells with displayed cohesins were observed in both assay types. EM371 cells bound more  
10 dockerin-tagged proteins and showed significantly higher  $\beta$ -glucosidase activity and  
11 fluorescence ( $P < 0.01$ ) than EM42 recombinants in almost all tested scenarios. This could not  
12 be ascribed to the better expression of autotransporter-scaffoldin chimeras in the naked strain.  
13 On the contrary, the expression levels of all three constructs were approximately 25 % lower  
14 in EM371 than in EM42, as judged by densitometric analysis of the SDS-PAGE gel with  
15 samples of cell lysates (**Figs. S6**). Hence, we assume that better display or accessibility of the  
16 exported scaffoldins on the surface of the naked strain is the correct explanation. Deletion  
17 mutants of *E. coli* BL21(DE3) lacking several abundant but non-essential outer membrane  
18 proteins were previously shown to be excellent hosts for overexpression of heterologous  
19 membrane  $\beta$ -barrel proteins, presumably because targeted knockouts relieved some of the  
20 burden on the Sec and BAM secretion machineries.<sup>51</sup> Moreover, removed surface structures  
21 leave more space for heterologous transporters and their passengers, which can make them  
22 better accessible for their binding partners.<sup>64</sup>

23 Out of the two tested cohesin-dockerin pairs, AcCoh and AcDoc showed lower binding  
24 affinity in both EM42 and EM371 strains (**Fig. 4**). This observation does not match the  
25 former outcome of the ELISA assay which indicated equally strong bonds in the two pairs  
26 (**Fig. 2b**). However, the current experiments were performed with whole cells, not cell-free  
27 extracts as in the case of ELISA, and it is possible that AcCoh architecture was affected  
28 during the secretion process in the non-native host. In the case of fluorescence measurements  
29 (**Fig. 4c and 4d**), the dimmer signals from the cells decorated with AcCoh + CFP-AcDoc  
30 complexes could partially stem also from lower brightness of the cyan fluorophore when  
31 compared with GFP.<sup>70</sup> However, the most probable cause of the observed phenomenon is that

1 the cohesin-dockerin pair from the mesophilic *Acetivibrio cellulolyticus* is less stable and  
2 more prone to disruption during the experimental treatment (including several cycles of cell  
3 centrifugation and washing) than the binding domains from thermophilic *Clostridium*  
4 *thermocellum*. As shown recently by Gunnoo and co-workers<sup>22</sup>, who performed molecular  
5 dynamics simulations with the very same cohesin-dockerin pairs, the *C. thermocellum* system  
6 presents a stronger hydrogen bond network and higher binding affinities than the *A.*  
7 *cellulolyticus* complex even at ambient temperature. These theoretical calculations together  
8 with our experimental data indicate that the binding domains from thermophilic cellulolytic  
9 bacteria might be a better choice for assembly of stable scaffoldin-enzyme interactions also  
10 on the surface of mesophilic microbial hosts.

11 Another conclusion which deserves attention is that *P. putida* cells displaying larger AcCoh-  
12 CtCoh scaffoldins were able to bind more enzyme or fluorophore molecules than  
13 recombinants decorated with single cohesins (**Fig. 4**). This trend was especially pronounced  
14 with *P. putida* EM42 pSEVA238\_AcCoh-CtCoh. The strain showed 2.9-fold or 2.3-fold  
15 higher  $\beta$ -glucosidase activity (**Fig. 4a and 4b**) and 1.5-fold or 4.3-fold enhanced fluorescence  
16 (**Fig. 4c and 4d**) when compared with its AcCoh- or CtCoh-exporting counterparts,  
17 respectively. This somewhat counterintuitive observation is in agreement with the study of  
18 Wieczorek and Martin<sup>35</sup> who described the same phenomenon for the secretion of designer  
19 scaffoldins in the Gram-positive bacterium *Lactococcus lactis*. Larger molecules may make  
20 more space for themselves on the “bushy” surface of EM42 strain and are thus better  
21 accessible for binding partners than buried single cohesins. This hypothesis is supported by  
22 the fact that such a vast difference between the display of single- and two-cohesin scaffoldin  
23 was not observed with shaved EM371 recombinants (**Fig. 4**). In these, both smaller and larger  
24 scaffoldins were equally (**Figs. 4a and 4c**) or similarly (**Figs 4b and 4d**, the difference is 1.4-  
25 and 1.5-fold) accessible for AcDoc- and CtDoc-tagged proteins, respectively. The higher  
26 accessibility of the two-cohesin scaffoldin in the EM42 recombinant was certainly not the  
27 outcome of its better expression. On the contrary, AcCoh-CtCoh was the least expressed  
28 construct from all three tested scaffoldin variants both in EM42 and EM371 (**Fig. S6**).

29 The aforementioned phenomena were re-confirmed by observing the cells with surface-  
30 docked fluorescent proteins in the confocal microscope (**Fig. 5**). We could see that: (i) *P.*  
31 *putida* EM371 recombinants showed brighter fluorescent signal than the EM42 strains, (ii) the

1 fluorescence of cells with attached CFP-AcDoc was dimmer than the fluorescence of their  
2 GFP-CtDoc binding counterparts, and (iii) the fluorescence of the EM42 strain expressing the  
3 larger AcCoh-CtCoh scaffoldin was more visible than the fluorescence of EM42 cells with  
4 displayed single cohesins. The microscopy technique allowed us to also examine positioning  
5 of the secreted scaffoldins on the surface of the tested strains. The fluorescence signal was  
6 more concentrated in the poles of all EM42 and EM371 recombinants (**Fig. 5**), which  
7 indicates asymmetric distribution of the Ag43 autotransporter in the cellular membrane. Such  
8 accumulation of overexpressed Ag43 at the polar edges was recently reported also for *E.*  
9 *coli*<sup>69</sup> and can be a consequence of a cell wall material pushing towards the poles through the  
10 continuous lateral insertion of new peptidoglycan building blocks over the rounds of growth  
11 and division.<sup>71</sup>

12

13 ***Cross-reactivity test and quantification of the scaffoldin molecules displayed on the *P.****  
14 ***putida* surface.** Characterized cohesin-dockerin pairs, including those used in this study, are  
15 known for their high binding specificity.<sup>24</sup> However, to rule out any possible cross-reactivity  
16 of the binding domains adopted for the aforementioned set of experiments, we added *P.*  
17 *putida* EM371 displaying CtCoh or AcCoh with unmatched BglC-AcDoc or BglC-CtDoc,  
18 respectively. The cells showed no  $\beta$ -glucosidase activity upon incubation with pNPG, which  
19 confirmed the expected exclusivity of AcCoh-AcDoc and CtCoh-CtDoc bonds (**Fig. S7**). This  
20 fact together with the assumed 1:1 dockerin-cohesin binding ratio allowed us to estimate the  
21 number of enzyme molecules docked to the surface of a single *P. putida* cell. Knowing the  
22 theoretical number of BglC-CtDoc molecules ( $\sim 9.49 \times 10^{12}$ ) in the control reaction with 1  $\mu\text{g}$   
23 of the chimeric enzyme (**Fig. 4b**) and the approximate number of *P. putida* cells ( $\sim 1.138 \times$   
24  $10^9$ ) in suspension used for the whole-cell  $\beta$ -glucosidase activity measurements, we estimated  
25 the counts of cohesin-dockerin bonds per bacterium to be  $\sim 1.8 \times 10^3$  or  $\sim 4.0 \times 10^3$  for the  
26 EM42 strain displaying the CtCoh or AcCoh-CtCoh scaffoldins, respectively, and  $\sim 7.8 \times 10^3$   
27 or  $\sim 11.0 \times 10^3$  for the EM371 strain decorated with CtCoh or AcCoh-CtCoh, respectively.  
28 The amount of designer scaffoldins displayed on a single naked *P. putida* EM371 cell *via* an  
29 autotransporter system was similar to the number of comparable single- and two-cohesin  
30 scaffoldins exported to the surface of the Gram-positive bacterium *L. lactis* in the study of  
31 Wieczorek and Martin.<sup>35</sup> On the other hand, the number of recombinant protein molecules

1 displayed on the EM42 strain did not exceed the values typically reported for Gram-negative  
2 hosts such as *E. coli*.<sup>62,72</sup> These calculations highlighted the superiority of the *P. putida*  
3 EM371 over the EM42 strain in terms of scaffoldin secretion efficiency.

4

5 ***Viability tests and growth of EM42 and EM371 recombinants with surface-docked  $\beta$ -***  
6 ***glucosidase in minimal medium with cellobiose.*** As discussed above, autodisplay of  
7 recombinant proteins can affect the viability of a host which might eventually hamper the  
8 applicability of a whole-cell biocatalyst. We compared the final optical densities of the  
9 cultures conducted to prepare *P. putida* recombinants for the aforementioned assays to  
10 evaluate the effect of scaffoldin expression on the viability of EM42 and EM371 strains (**Fig.**  
11 **6**). None of the cultures showed a substantial drop in OD<sub>600</sub> after five hours of induction with  
12 3-methylbenzoate when compared with the respective controls. Absorbance of cultures with  
13 the EM42 recombinant secreting the two-cohesin scaffoldin was reduced by 9 % ( $P < 0.05$ ) or  
14 14 % ( $P < 0.01$ ) when compared with cultures of EM42 pSEVA238\_*ag43AT-acCoh* or EM42  
15 pSEVA238\_*ag43AT-ctCoh*, respectively. However, this minor viability decrease is negligible  
16 given the greater capacity of the AcCoh-CtCoh-decorated cells to bind dockerin-tagged  
17 proteins (**Figs. 4 and 5**). There were no statistically significant differences in viability among  
18 EM371 recombinants with displayed scaffoldins (**Fig. 6a**). Only the control strain expressing  
19 *ag43AT* alone showed, much to our surprise, ~20 % lower OD<sub>600</sub> ( $P < 0.01$ ) than the  
20 remaining EM371 cultures. The same was not seen among EM42 recombinants. Hence we  
21 argue that the reduced culture absorbance might be attributed rather to the enhanced clumping  
22 of the EM371 pSEVA238\_*ag43AT* cells than to their affected viability. The clumping could  
23 be caused by the remaining  $\beta$ -helical part of the autotransporter  $\beta$ -domain which also includes  
24 an extracellular autochaperone domain. This structure might be more accessible on the surface  
25 of the naked strain and promote autoaggregation which is normally associated only with  $\beta$ -  
26 helical  $\alpha$  domain of the wild-type Ag43.<sup>73</sup>

27 It must be emphasized here that all EM371 recombinants and controls grew slower than their  
28 EM42 counterparts and their final ODs were ~20 % lower ( $P < 0.01$ ) (**Fig. 6a**). This  
29 observation is in agreement with the previous study of Martínez-García and co-workers  
30 (2020)<sup>46</sup> and can be attributed to the reduced fitness of the naked strain. Suboptimal viability  
31 of EM371, when compared with the robust EM42 chassis, has been a great concern from the

1 beginning of this study. If scaffoldin-bearing *P. putida* strains should serve as reliable enzyme  
2 carriers in future real-life projects, they must provide both sufficiently high cell densities and  
3 a considerable capacity to attach recombinant proteins to their surface. The data presented in  
4 this work, nonetheless, indicate that the benefit of greater display efficiency of EM371 can  
5 compensate for lower vigor of this strain. To verify this assumption and to test the two  
6 parameters simultaneously, we incubated the AcCoh-CtCoh-displaying EM42 and EM371  
7 strains with either BglC-CtDoc only (we will call here these strains EM42+ and EM371+ for  
8 simplification) or with both BglC-CtDoc and BglC-AcDoc (EM42++ and EM371++ in the  
9 following text), and we let the washed cells grow in minimal medium with cellobiose used as  
10 a sole carbon source (**Fig. 6b**). The assay confirmed that all four tested strains bound such a  
11 quantity of  $\beta$ -glucosidase molecules that provided *P. putida* cells with an amount of glucose  
12 sufficient for growth. The observed growth was linear most probably due to the constant  
13 amount of  $\beta$ -glucosidase molecules in the reaction. Importantly, EM371 recombinants clearly  
14 outperformed EM42 strains (**Fig. 6b**). The EM371++ strain grew  $\sim 3$ -times faster than  
15 EM42++ ( $\mu = 0.064 \text{ h}^{-1}$  and  $0.023 \text{ h}^{-1}$ , respectively) and the EM371+ strain grew  $\sim 4$ -times  
16 faster than EM42+ ( $\mu = 0.048 \text{ h}^{-1}$  and  $0.013 \text{ h}^{-1}$ , respectively). It is also noteworthy that the  
17 EM42++ and EM371++ grew significantly faster ( $P < 0.01$ ) than the EM42+ and EM371+  
18 strains. This indicated that both cohesins in the AcCoh-CtCoh scaffoldin were occupied by  
19 BglC-AcDoc and BglC-CtDoc at the same time, and there was an additive effect of the two  
20 BglC molecules. The specific growth rate of EM42+ was  $\sim 57$  % of the growth rate of  
21 EM42++ and  $\mu$  of EM371+ was  $\sim 75$  % of EM371++'s rate. This result was in agreement with  
22 the outcome of the above-described assays (**Fig. 4**) and suggested once again that  $\beta$ -  
23 glucosidase was better attached to the cell surface through the CtDoc-CtCoh interaction than  
24 through the AcDoc-AcCoh binding pair.

25 The described experiment was also an addition to our previously published study in which we  
26 identified the growth of *P. putida* with cytoplasmic BglC on cellobiose.<sup>4</sup> Here, we  
27 demonstrated that this enzyme can be tagged with dockerin, overproduced in *P. putida*,  
28 purified and turned into a cellulosomal mode on the same host, while its activity with a  
29 natural substrate is preserved. Intracellular BglC production is nonetheless a more attractive  
30 option for our future research. In such a scenario, only two enzymes – an endoglucanase and  
31 an exoglucanase or a cellobiohydrolase – need to be assembled in a functional

1 minicellulosome on the surface of a *P. putida* recombinant to enable the decomposition of  
2 crystalline cellulose and its utilization for cellular growth. Moreover, well-expressed  
3 intracellular  $\beta$ -glucosidase would not become a bottleneck for efficient cellulose hydrolysis as  
4 is often reported,<sup>40,74</sup> but, on the contrary, would secure rapid drain of cellobiose from the  
5 cellular surface and prevent inhibition of the remaining cellulases.<sup>75</sup>

6

## 7 **Discussion**

8 Here, we evaluated the capacity of two biotechnologically relevant strains of the Gram-  
9 negative bacterium *P. putida*, strains EM42 and EM371 with differences in the complexity of  
10 the cellular surface, to display variants of designer scaffoldin proteins and serve as future  
11 carriers for cellulosome-like structures.

12 Single-cohesin and two-cohesin scaffoldins were first prepared together with chimeric  
13 dockerin-tagged variants of  $\beta$ -glucosidase BglC and two fluorophores CFP and GFP. These  
14 dockerin-tagged reporters allowed direct detection and quantification of displayed scaffoldins  
15 in the subsequent assays. A screening among available monomeric autotransporters identified  
16 truncated antigen Ag43 from *E. coli* as a potent candidate for display of prepared scaffoldins.  
17 The Ag43-based secretion systems have been repeatedly proven useful for display or  
18 secretion of recombinant proteins in *E. coli*,<sup>37,38,69</sup> but, to the best of our knowledge, the use of  
19 this autotransporter has not been reported for *P. putida*, thus far.

20 Single- and two-cohesin scaffoldins displayed *via* the Ag43 autotransporter were then  
21 detected on the surfaces of the *P. putida* EM42 and EM371 recombinants. The resulting  
22 complexes were not cellulolytic, but their investigation allowed insight into parameters  
23 affecting the assembly of such synthetic structures on the surface of a Gram-negative bacterial  
24 host. We confirmed that both the nature of a displayed scaffoldin and the character of a host  
25 cell's exterior matter. Out of the two tested cohesin-dockerin pairs, the one from thermophilic  
26 *C. thermocellum* showed better bonding in all cases, even though the position of CtCoh in  
27 two-cohesin scaffoldin was theoretically less favorable for interaction with the respective  
28 dockerin (closer to the cell wall) than that of AcCoh from the mesophilic bacterium *A.*  
29 *cellulolyticus*. Interestingly, the size of the larger two-cohesin scaffoldin appeared not to be a  
30 bottleneck for the display. On the contrary, AcCoh-CtCoh was more accessible on the



1 surfaces of the EM42 and EM371 recombinants than the individually displayed cohesins. This  
2 is a promising result for our further work, because only parallel assembly of two or more  
3 cellulases on the same scaffoldin can promote the substrate channeling effect and result in  
4 more efficient whole-cell biocatalysts compared to bacteria displaying or secreting single  
5 enzymes.<sup>42,76</sup>

6 Both two-cohesin and single-cohesin scaffoldins were much more accessible on *P. putida*  
7 EM371 than on EM42. We show that up to tens of thousands of scaffoldins can be displayed  
8 on the surface of single shaved *P. putida* cell. Nonetheless, the performance of such a strain to  
9 be used as a potential biocatalyst must be evaluated from the point of view of both display  
10 capacity and the strain's viability. The EM371 strain with surface-bound  $\beta$ -glucosidase also  
11 outperformed the EM42 recombinant in the growth on natural substrate cellobiose. This result  
12 indicates that despite its slightly compromised fitness, *P. putida* EM371 shows considerable  
13 potential to become a platform for attachment of designer catalytic scaffoldins and that  
14 "surface shaving" represents a viable strategy for the design of new Gram-negative bacterial  
15 catalysts.

16 Further improvement of scaffoldin display is possible in both of the discussed *P. putida*  
17 strains, because the outer membrane of a Gram-negative bacterium can accommodate up to  
18 hundreds of thousands of protein molecules.<sup>77</sup> More scaffoldins could be available on the cell  
19 surface after *e.g.*, optimization of *ag43AT* expression,<sup>52</sup> removal of periplasmic and outer  
20 membrane proteases that can cleave autotransporter or its passenger,<sup>78</sup> or addition of  
21 secretion-promoting CBM to the N-terminus of displayed cohesins.<sup>35</sup> Besides, the binding of  
22 enzymes to the displayed scaffoldins could be further enhanced by the adoption of cohesin-  
23 dockerin pairs from extreme thermophiles<sup>22,79</sup> or by increasing the length of linkers between  
24 individual cohesins.<sup>80</sup> The remaining challenge for *in vivo* assembly of functional designer  
25 cellulosomes in a Gram-negative host lies in supplementation of bulky cellulases whose  
26 recombinant production and secretion in non-cellulolytic bacteria is problematic.<sup>40,81</sup>  
27 However, as shown in several recent studies, this obstacle can be elegantly bypassed, *e.g.*, by  
28 the design of a synthetic interkingdom fungal-bacterial consortium<sup>82,83</sup> or a single-species co-  
29 culture of strains with synergistic functions.<sup>84</sup> These and other strategies are being considered  
30 to complement the work described here and pave the way to *P. putida*-based cell factories for  
31 the valorization of polymeric waste feedstocks.

1

## 2 **Materials and methods**

3 ***Bacterial strains, media and growth conditions.*** Bacterial strains used in this study are listed  
4 in **Ta Supplementary Table S1**. *Escherichia coli* strains employed for cloning or triparental  
5 mating and *Pseudomonas putida* strains used for heterologous gene expression were routinely  
6 grown in lysogeny broth (LB; 10 g L<sup>-1</sup> tryptone, 5 g L<sup>-1</sup> yeast extract, 5 g L<sup>-1</sup> NaCl, pH 7.0) at  
7 37°C or 30°C, respectively. *P. putida* strains were routinely pre-cultured overnight (15 h) in  
8 2.5 mL of LB medium with agitation of 300 rpm (Heidolph Unimax 1010 and Heidolph  
9 Incubator 1000; Heidolph Instruments, Germany). All used solid media (LB or M9 salts  
10 minimal medium; per 1 L: 8.5 g Na<sub>2</sub>HPO<sub>4</sub> 2H<sub>2</sub>O, 3.0 g KH<sub>2</sub>PO<sub>4</sub>, 1.0 g NH<sub>4</sub>Cl, 0.5 g NaCl, pH  
11 7.0) contained 15 g L<sup>-1</sup> agar. Solid M9 salts media were prepared with 2 mM MgSO<sub>4</sub>, 2.5 mL  
12 L<sup>-1</sup> trace element solution<sup>86</sup> and 0.2 % (w/v) citrate used as a sole carbon source. Antibiotics  
13 of following final concentrations were added to the liquid and solid media to maintain used  
14 plasmids: kanamycin (Km) 50 µg mL<sup>-1</sup>, chloramphenicol (Cm) 30 µg mL<sup>-1</sup>, ampicillin (Amp)  
15 150 µg mL<sup>-1</sup>. Growth conditions specific for individual experiments are described in the  
16 following sections.

17

18 ***Plasmid and strain constructions.*** All used and constructed plasmids from this study are  
19 listed in **Supplementary Table S1**. Standard laboratory protocols<sup>87</sup> were used for DNA  
20 manipulations. Oligonucleotide primers used in this study (**Supplementary Table S2**) were  
21 purchased from Sigma-Aldrich (USA). Plasmid DNA was isolated with QIAprep Spin  
22 Miniprep kit (Qiagen, USA). The genes of interest were amplified by polymerase chain  
23 reaction (PCR) using Q5 high fidelity DNA polymerase (New England BioLabs, USA)  
24 according to the manufacturer's protocol. The reaction mixture (50 µL) consisted of  
25 polymerase HF or GC buffer (New England BioLabs, USA), water, dNTPs mix (0.2 mM  
26 each; Roche, Switzerland), template DNA, primers (0.5 mM each), and DMSO (in case of  
27 high GC content in an amplified gene). Two-step overlap extension (OE) PCR<sup>88</sup> with Q5  
28 DNA polymerase was adopted for the preparation of chimeric genes. PCR products from the  
29 first reaction were purified with NucleoSpin Gel and PCR Clean-up (Macherey-Nagel,  
30 Germany) and used (1 µL) as templates in the second PCR round. NucleoSpin Gel and PCR

1 Clean-up kit was also routinely used for purification of PCR products either directly from  
2 PCR mixture or agarose gels. Colony PCR was performed using NZYTaQ II 2x Green Master  
3 Mix solution (NZYTech, Portugal). DNA concentration was measured with NanoVue  
4 spectrophotometer (GE Healthcare, USA). All restriction enzymes and Quick Ligation kit  
5 used for ligation of digested fragments were from New England BioLabs (USA). Digested  
6 plasmids and PCR products were separated by DNA electrophoresis with 0.8 % (w/v) agarose  
7 gels and visualized using Molecular Imager VersaDoc (Bio-Rad, USA). The flawlessness of  
8 PCR-amplified genes cloned into target plasmids was checked by DNA sequencing  
9 (Macrogen, South Korea). Chemocompetent *E. coli* cells (CC118 or Dh5 $\alpha$ ) transformed with  
10 plasmids or ligation mixtures were selected on LB agar plates with respective antibiotic,  
11 single clones were re-streaked on new LB agar plates with an antibiotic and grown cells were  
12 collected in 1 mL of LB with glycerol (20 % w/v) and stored at -80°C. Plasmid constructs  
13 were transferred from *E. coli* Dh5 $\alpha$  or CC118 donor to *P. putida* EM42 or EM371 by  
14 triparental mating, using *E. coli* HB101 helper strain with pRK600 plasmid (**Supplementary**  
15 **Table S1**). Alternatively, electroporation (2.5 kV, 4 – 5 ms pulse) was used for the  
16 transformation of *P. putida* cells with selected plasmids using a MicroPulser electroporator  
17 and Gene Pulser Cuvettes with 0.2 cm gap (Bio-Rad, USA). Preparation of *P. putida*  
18 electrocompetent cells and electroporation procedure itself was performed as described  
19 elsewhere.<sup>89</sup> *P. putida* transconjugants or transformants were selected on M9 agar plates with  
20 citrate or on LB agar plates, respectively, with respective antibiotic. All plasmid constructs  
21 inserted in *P. putida* were first isolated and re-checked by restriction digestion before the  
22 strain was used for further work.

23

24 **Preparation of scaffoldin variants, chimaeric proteins, and autotransporters.** The original  
25 synthetic scaffoldin gene *scaf19L*,<sup>47</sup> which encodes carbohydrate-binding module CBM3a and  
26 cohesin CohCt A2 (named CtCoh in this study) of the cellulosomal-scaffolding protein CipA  
27 from *Clostridium thermocellum*, cohesin CohAc C3 (named AcCoh in this study) of the  
28 cellulosomal-scaffolding protein ScaC from *Acetivibrio cellulolyticus*, and cohesin CohBc B3  
29 (named BcCoh in this study) of the cellulosomal-scaffolding protein ScaB from *Bacteroides*  
30 *cellulosolvens* interconnected with 27-35 aa long linkers, was PCR amplified using Q5  
31 polymerase and primers Sca19L fw and Sca19L rv (**Supplementary Table S2**) and subcloned

1 into *NdeI* and *PstI* restriction sites of the modified version of pSEVA238 expression plasmid,  
2 pSEVA238b, with synthetic ribosome binding site (RBS).<sup>4</sup> In parallel, a version of the  
3 *scaf19LKT* gene with synthetic RBS was synthesized and codon-optimized for expression in  
4 *P. putida* KT2440 (GeneCust, France). The synthetic gene was subcloned from delivery  
5 vector pUC57\_*scaf19LKT* into *SacI* and *KpnI* sites of pSEVA238.

6 The *bglC* gene encoding  $\beta$ -glucosidase (EC 3.2.1.21) from *Thermobifida fusca*<sup>90</sup> with N-  
7 terminal 6x histidine tag and *ctDoc* gene (encoding *C. thermocellum* dockerin, named here  
8 CtDoc, complementary to CtCoh) codon-optimized for expression in *P. putida* KT2440  
9 (GeneCust, France) were separately amplified by PCR from pSEVA238b\_*bglC*<sup>4</sup> and  
10 pUC57\_*ctDoc*, respectively, using primer pairs BglC-CtDoc TS1F / BglC-CtDoc TS1R and  
11 BglC-CtDoc TS2F / BglC-CtDoc TS2R. The first round PCR products were sewed in the  
12 second round of OE PCR with TS1F and TS2R primers. The resulting *bglC-ctDoc* chimeric  
13 gene was cloned into *NdeI* and *HindIII* sites of pSEVA238b. The pSEVA\_*bglC-acDoc*  
14 construct bearing *bglC* gene tagged with codon-optimized *A. cellulolyticus* ScaB dockerin,  
15 named here AcDoc, was prepared correspondingly using primer pairs BglC-CtDoc TS1F /  
16 BglC-AcDoc TS1R and BglC-AcDoc TS2F / BglC-AcDoc TS2R and template plasmids  
17 pSEVA238b\_*bglC* and pUC57\_*acDoc*.

18 For the purpose of construction of the plasmid allowing the translational fusion of CtDoc to  
19 monomeric superfolded GFP (msfGFP), the *gfp* gene was initially amplified with synthetic  
20 RBS but without STOP codon from pSEVA238\_*gfp* plasmid (SEVA collection) using GFP-N  
21 fw and GFP-N rv primers. The PCR product was digested with *AvrII* and *EcoRI* and ligated  
22 into pSEVA238, cut with the same pair of enzymes, giving rise to pSEVA238\_*gfpN*. The  
23 *ctDoc* gene was amplified from pSEVA238\_*bglC-acDoc* with its synthetic SGGGS Gly-Ser  
24 linker and with its TAA STOP codon using CtDoc fw and CtDoc rv primers. The PCR  
25 product was digested with *SacI* and *HindIII* and cloned downstream of the *gfp* gene in  
26 pSEVA238\_*gfpN*, resulting in pSEVA238\_*gfp-ctDoc*. The *gfp-ctDoc* construct was then  
27 subcloned into *NdeI* and *HindIII* sites of pET21b for the purpose of gene overexpression and  
28 purification of the chimeric protein.

29 The pSEVA238b\_*ag43AT* construct was prepared by subcloning the recombinant Ag43  
30 autotransporter gene from pAg43pol<sup>38</sup> into *NdeI* and *HindIII* sites of the pSEVA238b vector  
31 with synthetic RBS. The *estPAT* gene encoding C-terminal part (331 AA) of EstP esterase

1 autotransporter from *P. putida* KT2440 (PP\_0418) with original 23 AA N-terminal leader  
2 sequence, E-tag, and polylinker was commercially synthesized (GeneCust, France) and then  
3 subcloned from delivery vector pUC57 into *Nde*I and *Hind*III sites of pSEVA238b.

4 Single cohesin gene *ctCoh* was PCR amplified from pSEVA238\_ *scaf*19LKT for the purpose  
5 of subcloning into the polylinkers of three tested autotransporter systems using primer pair  
6 CtCoh fw and CtCoh rv1 (for cloning into *Xho*I and *Bam*HI sites of pSEVA238b\_ *ag*43AT  
7 polylinker) or CtCoh fw and CtCoh rv2 (for cloning into *Eco*RI and *Bam*HI sites of  
8 pSEVA238\_ *ig*AAT and pSEVA238\_ *int*AT). These manipulations gave rise to the constructs  
9 pSEVA238\_ *ig*AAT-*ctCoh*, pSEVA238\_ *int*AT-*ctCoh*, and pSEVA238b\_ *ag*43AT-*ctCoh*. The  
10 pSEVA238b\_ *ag*43AT-*acCoh* construct was prepared by subcloning of the *acCoh* gene, PCR  
11 amplified from pSEVA238\_ *scaf*19LKT with primers AcCoh fw and AcCoh rv, into *Xho*I and  
12 *Bam*HI sites of pSEVA238b\_ *ag*43AT polylinker. Similarly, the two-cohesin scaffoldin  
13 sequence *acCoh-ctCoh* was amplified from pSEVA238\_ *scaf*19LKT using the AcCoh-CtCoh  
14 fw and CtCoh rv1 primers and inserted into *Xho*I and *Bam*HI sites of pSEVA238b\_ *ag*43AT.

15

#### 16 ***Effect of scaffoldin and autotransporter expression on the viability of P. putida cells.***

17 Overnight cultures of *P. putida* EM42 cells bearing pSEVA238b\_ *scaf*19L, pSEVA238\_ *scaf*19LKT, or empty pSEVA238 were used to inoculate 20 mL of LB with Km  
18 in 100 mL shake flasks to initial OD<sub>600</sub> of 0.05. The cells were grown for three hours with  
19 shaking (170 rpm) and then 0.5 mM 3-methylbenzoate (3MB) was added to all cultures to  
20 induce expression of recombinant genes. The cells were further cultured for 18 h, and OD<sub>600</sub>  
21 was measured periodically. The effect of IgAAT, IntAT, Ag43AT, and EstPAT  
22 autotransporter expression from the pSEVA238 plasmid on viability of the EM42 host was  
23 tested correspondingly.

24

25  
26 ***Analysis of cohesin-dockerin interactions by affinity-based ELISA.*** Proper folding and  
27 ability of AcCoh, CtCoh, and BcCoh cohesins in Scaf19LKT scaffoldin produced in *P. putida*  
28 to bind respective dockerins was verified by affinity-based ELISA (enzyme-linked  
29 immunosorbent assay). *P. putida* EM42 pSEVA238\_ *scaf*19LKT was pre-grown overnight in  
30 2.5 mL of LB with Km and 10 mM CaCl<sub>2</sub>. The cells were then used to inoculate 50 mL of LB

1 medium with Km and 10 mM CaCl<sub>2</sub> in the main culture to the starting OD<sub>600</sub> of 0.05. The  
2 cells were cultured for 3 h at 30°C with shaking (200 rpm), and expression of scaffoldin gene  
3 was then induced with 1 mM 3MB. After 5 more hours of growth, the cells were collected by  
4 centrifugation (2,500 g, 4 °C, 15 min), washed with ice-cold TBS buffer (25 mM Tris-Cl, 137  
5 mM NaCl, 2.7 mM KCl, pH 7.2) with 10 mM CaCl<sub>2</sub> and 0.05 % Tween 20, and the cell pellet  
6 was frozen at -80 °C overnight. The pellet was then melted and added with 3 mL of TBS  
7 buffer, 0.3 mL of PopCulture Reagent (Merck Millipore, USA), 10 µL of DNase I (5 µg mL<sup>-1</sup>;  
8 Sigma-Aldrich, USA), and 10 µL of lysozyme (25 mg mL<sup>-1</sup> stock; Sigma-Aldrich, USA). The  
9 cell suspension was incubated for 30 min at room temperature, centrifuged (21,000 g, 4 °C,  
10 30 min), and supernatant (cell-free extract, CFEs) was used for further work. The  
11 concentration of total protein in CFE with recombinant Scaf19LKT was determined by  
12 Bradford reagent (Sigma-Aldrich, USA), CFE was diluted 1,000-times in 0.1 M sodium  
13 carbonate coating buffer (pH 9.0), and 100 µL (the same volume was used for all following  
14 steps) were used for overnight coating of individual wells in a MaxiSorp high protein-binding  
15 capacity 96-well ELISA plate (Nunc, Denmark) at 4 °C. In the morning, CFE was discarded  
16 from the plate, blocking buffer (TBS with 10 mM CaCl<sub>2</sub> and 0.05 % Tween 20, and 2 %  
17 BSA) was added to the wells, and the plate was incubated at room temperature for 1 h (the  
18 same incubation conditions were preserved in the remaining steps of the protocol). Blocking  
19 buffer was then removed, and the wells were added with fresh blocking buffer containing 0.1  
20 µg ml<sup>-1</sup> of one of three purified recombinant variants of *Geobacillus sp.* WBI xylanase Xyn-  
21 AcDoc, Xyn-CtDoc, or Xyn-BcDoc tagged with a dockerin module from *A. cellulolyticus*, *C.*  
22 *thermocellum*, or *B. cellulosolvans*, respectively. After the incubation step, the blocking buffer  
23 with proteins was discarded, and the wells were washed three times with wash buffer (TBS  
24 with 10 mM CaCl<sub>2</sub> and 0.05 % Tween 20). Anti-Xyn primary antibody diluted 10,000x in the  
25 blocking buffer was then added to the wells. After incubation, the washing step was repeated  
26 (three washes) and the secondary antibody (HRP-labeled anti-rabbit) diluted 10,000x in  
27 blocking buffer was added into the wells. This was followed by incubation and wash steps  
28 (four washes) and final detection with 100 µL of 3,3',5,5'-tetramethylbenzidine (TMB) and  
29 Substrate-Chromogen (Dako, Denmark). The reaction occurred for 30 s and then was stopped  
30 by the addition of 50 µL of 1 M H<sub>2</sub>SO<sub>4</sub> per well. The intensity of the resulting color was  
31 measured spectrophotometrically at 450 nm.

1  
2 **Protein purification by affinity chromatography.** His-tagged BglC, BglC-AcDoc, BglC-  
3 CtDoc, CFP-AcDoc, and GFP-CtDoc were purified from CFE prepared from *P. putida* EM42  
4 or *E. coli* BL21-Gold (DE3) (Agilent Technologies, USA) cells. Overnight cultures in 10 mL  
5 of LB with Km and 2 mM CaCl<sub>2</sub> were inoculated from single colonies of *P. putida* EM42  
6 pSEVA238\_bglC, *P. putida* EM42 pSEVA238\_bglC-AcDoc, *P. putida* EM42  
7 pSEVA238\_bglC-CtDoc, or *E. coli* BL21-Gold (DE3) pET28a\_cfp-AcDoc on LB agar plates.  
8 Medium with Amp was used for the *E. coli* BL21-Gold (DE3) pET21b\_gfp-ctDoc  
9 recombinant. Overnight cultures were used for inoculation of 200 mL of fresh LB medium  
10 with Km or Amp and 2 mM CaCl<sub>2</sub> to the final OD<sub>600</sub> of 0.05. Cells were grown with shaking  
11 (170 rpm) for 2.5 h and expression of chimeric genes was induced by 1 mM 3MB (*P. putida*  
12 with pSEVA238 plasmids) or 50 μM isopropyl β-D-1-thiogalactopyranoside (*E. coli* with  
13 pET plasmids). After induction, the *P. putida* cells were further cultured under the same  
14 conditions for another 5 h, while the *E. coli* cultures were grown overnight at a reduced  
15 temperature of 20 °C. Cells were then pelleted by centrifugation (2000 g, 15 min, 4 °C),  
16 washed with ice-cold purification buffer A (TBS with 10 mM CaCl<sub>2</sub>, 0.05 % Tween 20, and 5  
17 mM imidazole, pH 7.2), centrifuged again, resuspended in 5 mL of the same buffer, and  
18 frozen at -80 °C. The next day, the cell suspension was melted, added with ¼ of cComplete  
19 EDTA-free protease inhibitor cocktail tablet (Roche, Switzerland) and 5 μL of Lysonase  
20 Bioprocessing Reagent (Merck Millipore, USA) and sonicated 6 x 2 min on ice until the  
21 suspension became transparent. The cell lysate was centrifuged (21,000 g, 4 °C, 30 min) and  
22 the resulting CFE was collected. Total protein concentration in CFE was determined by  
23 Bradford reagent (Sigma-Aldrich, USA), and ~55 mg of total protein in CFE was incubated  
24 for 60 min at 4 °C with 2 mL of Ni-NTA agarose (QIAGEN, Germany) equilibrated with  
25 purification buffer A. The slurry was applied to a 10-mL Poly-Prep chromatography column  
26 (Bio-Rad, USA), which was then washed with 10 mL of purification buffer B (purification  
27 buffer A with 50 mM imidazole). His-tagged protein was eventually eluted with purification  
28 buffer C (purification buffer A with 500 mM imidazole) in 1.5 mL fractions. Fractions with  
29 the highest β-glucosidase activity or GFP or CFP fluorescence were pooled and applied to an  
30 Amicon Ultra centrifugal filter unit with 10 kDa cutoff (Merck Millipore, USA) for protein  
31 concentration and buffer exchange (TBS with 10 mM CaCl<sub>2</sub>, 0.05 % Tween 20, and 10 %

1 glycerol). The concentration of purified proteins was determined by Bradford reagent, and  
2 proteins were stored at 4 °C or at -20 °C for further use.

3

4 ***β-glucosidase activity assay.*** β-glucosidase activity of purified BglC, BglC-CtDoc and BglC-  
5 AcDoc was measured using the synthetic substrate *p*-nitrophenyl-β-D-glucopyranoside  
6 (pNPG; Sigma-Aldrich, USA) following the previously described protocol<sup>4</sup> with some  
7 modifications. Briefly, the reaction mixture (total volume 1,200 μL) contained 1,138 μL of 50  
8 mM sodium phosphate buffer (pH 7.0), 60 μL of pNPG (final conc. 5 mM), and 2 μL of  
9 enzyme of concentration adjusted to 0.1 mg mL<sup>-1</sup>. The reaction was run in 1.5 mL test tubes at  
10 37 °C. Samples (600 μL) were withdrawn at 10 and 20 min intervals, mixed with 400 μL of 1  
11 M Na<sub>2</sub>CO<sub>3</sub> to stop the reaction, and the absorbance of the mixture was measured in a cuvette  
12 at 405 nm with a UV/Vis spectrophotometer Ultrospec 2100 (Biochrom, UK). Linearity of the  
13 enzymatic reaction during the given time interval was checked prior to these measurements.  
14 Specific activity (U mg<sup>-1</sup>) was calculated using the calibration curve, prepared with a *p*-  
15 nitrophenol standard (Sigma-Aldrich, USA). One unit (U) of enzymatic activity corresponds  
16 to one μmol of *p*-nitrophenol produced per minute.

17

18 ***Evaluation of scaffoldin display and cohesin-dockerin binding on the P. putida cell surface***  
19 ***by β-glucosidase activity assay.*** The following culture procedure was used for the preparation  
20 of cells for subsequent whole-cell assays as well as for evaluation of recombinant protein  
21 levels in derived *P. putida* CFEs using SDS-PAGE and western blot analyses. *P. putida*  
22 EM42 or EM371 strains, bearing empty pSEVA238 plasmid (negative control) or pSEVA238  
23 plasmid harboring an autotransporter gene with a single- or double-cohesin scaffoldin, were  
24 inoculated directly from glycerol stocks into 2.5 mL of LB medium with Km and 10 mM  
25 CaCl<sub>2</sub> and grown overnight with shaking. Overnight cultures were used to inoculate 10 mL of  
26 LB medium with Km and 10 mM CaCl<sub>2</sub> to starting OD<sub>600</sub> of 0.05. Cells were cultured for 2.5  
27 h with shaking (250 rpm, Unimax 1010 shaker and 1000 Inkubator, Heidolph, Germany), and  
28 expression of the autotransporter-scaffoldin chimera was then induced with 0.5 mM 3MB.  
29 After 4.5 h of induction, the final OD<sub>600</sub> was measured, and cells were collected by  
30 centrifugation (2000 g, 4 °C, 10 min). Cells were washed with 10 mL of ice-cold TBS buffer



1 with 10 mM CaCl<sub>2</sub> and 0.05 % Tween 20, centrifuged again and resuspended in 0.5 mL of the  
2 same buffer to the OD<sub>600</sub> of 10.0. Then, 25 µL of purified BglC, BglC-CtDoc or BglC-AcDoc  
3 of 1 mg mL<sup>-1</sup> concentration (~1.0x10<sup>5</sup> molecules per cell) were added to the cell suspension,  
4 and the whole mixture was incubated in a 1.5 mL test tube for 14 h (overnight) at 4 °C with  
5 gentle rotation of the tube (SB2 Rotator, Stuart, UK).

6 For comparison of the three distinct autotransporters displaying CtCoh on the surface of *P.*  
7 *putida* EM42 or EM371, the cell suspension (250 µL) was washed three times with 1 mL of  
8 ice-cold TBS buffer with CaCl<sub>2</sub> and Tween 20, re-suspended in 250 µL of the same buffer  
9 (warmed to room temperature) and added with 5 µL of 100 mM pNPG. The same mixture  
10 with EM42 or EM371 cells bearing an empty pSEVA238 plasmid served as a negative  
11 control. The mixture in TBS buffer without cells but with purified BglC (1 µL of enzyme of 1  
12 mg mL<sup>-1</sup> concentration) served as a positive control. The mixtures were incubated for 60 min  
13 at 37 °C with shaking (300 rpm, Unimax 1010 shaker and 1000 Inkubator, Heidolph,  
14 Germany). Cells were then pelleted by brief centrifugation (2370 g, room temperature, 3  
15 min), supernatants (100 µL) were mixed with 50 µL of 1 M Na<sub>2</sub>CO<sub>3</sub> in 96-well plate, and  
16 absorbance at 405 nm was measured using a Victor<sup>2</sup> 1420 Multilabel Counter (Perkin Elmer,  
17 USA). End-point absorbance values, which corresponded with the activity of the cell surface-  
18 bound β-glucosidase molecules, were related to the absorbance measured for free β-  
19 glucosidase (positive control) and used for comparison of the displaying capacity of the tested  
20 autotransporters in the EM42 and EM371 strains. Possible cross-reactivity of AcDoc with  
21 CtCoh and CtDoc with AcCoh was tested using the aforementioned protocol applied on  
22 EM371 cells which displayed Ag43AT-CtCoh or Ag43AT-AcCoh fusion and which were  
23 incubated with purified BglC-AcDoc or BglC-CtDoc protein, respectively.

24 Alternatively, for the purpose of quantitative evaluation of BglC-CtDoc or BglC-AcDoc  
25 binding to a respective scaffoldin variant (CtCoh, AcCoh, or AcCoh-CtCoh) displayed on  
26 EM42 and EM371 cells with Ag43AT, a cell suspension after overnight incubation with  
27 complimentary BglC-XDoc chimera was washed three times with ice-cold TBS buffer  
28 containing CaCl<sub>2</sub> and Tween 20, diluted twice with the same buffer (OD<sub>600</sub> = 5.0), and 0.5 mL  
29 was warmed in 1.5 mL test tube for 10 min at 37 °C. Suspension with EM42 or EM371 cells  
30 bearing pSEVA238b\_ *ag43AT* served as negative control. Suspensions were then added with  
31 10 µL of 100 mM pNPG to start the enzymatic reaction. A positive control reaction was run

1 in TBS buffer with the addition of 1  $\mu\text{L}$  of purified BglC-CtDoc or BglC-AcDoc at 1  $\text{mg mL}^{-1}$   
2 concentration. Samples (100  $\mu\text{L}$ ) were withdrawn every five min (total length of the reaction  
3 was 20 min), mixed with 50  $\mu\text{L}$  of 1 M  $\text{Na}_2\text{CO}_3$ , and the cells were removed by centrifugation.  
4 The supernatant (100  $\mu\text{L}$ ) was transferred to the 96-well plate, and absorbance at 405 nm was  
5 measured using a Victor<sup>2</sup> 1420 Multilabel Counter (Perkin Elmer, USA). In the case of low  $\beta$ -  
6 glucosidase activity detected, the time intervals of the sample withdrawal were extended to  
7 allow accurate activity quantification. Activity (1 U = 1  $\mu\text{M min}^{-1}$ ) was calculated using a  
8 calibration curve prepared with a *p*-nitrophenol standard (Sigma-Aldrich, USA). Activity of  
9 the enzyme bound to the surface of each of the tested recombinants was related to the  
10 calculated activity of free purified BglC-CtDoc or BglC-AcDoc and used for quantitative  
11 comparison of the enzyme-binding capacity of the EM42 and EM371 strains displaying  
12 single-cohesin or two-cohesin scaffoldin.

13 The number of enzyme molecules bound to the surface of a given EM42 or EM371  
14 recombinant was estimated from the molecular weight of BglC-CtDoc (63.46 kDa) or BglC-  
15 AcDoc (63.94 kDa) calculated using ExPASy Compute pI/Mw tool (<https://web.expasy.org>)  
16 and from the average number of *P. putida* cells present in 0.5 mL suspension of  $\text{OD}_{600}$  of 5.0  
17 ( $\sim 1.1375 \times 10^9$ ), determined by counting the cells in samples diluted to  $\text{OD}_{600}$  of 0.2 in a  
18 Bürker chamber (Brand, Germany) using Olympus BX50 microscope with 100x oil  
19 immersion objective (Olympus, Japan). Assuming a dockerin:cohesin ratio of 1:1, the  
20 calculated amount of  $\beta$ -glucosidase molecules anchored to the cell corresponds to the number  
21 of scaffoldins displayed on the cell surface.

22  
23 ***Evaluation of scaffoldin display and cohesion-dockerin binding on the P. putida cell***  
24 ***surface using fluorescent proteins.*** EM42 and EM371 cells for quantitative evaluation of  
25 GFP-CtDoc or CFP-AcDoc binding to scaffoldin variants displayed with Ag43AT were  
26 prepared as described in the previous section. The cells (0.5 mL,  $\text{OD}_{600}=1.0$ ) were incubated  
27 overnight at 4 °C with 25  $\mu\text{L}$  of purified dockerin-tagged fluorescent protein of 1  $\text{mg mL}^{-1}$   
28 stock concentration ( $\sim 1.8 \times 10^5$  fluorophore molecules per cell). After washing and dilution  
29 with TBS buffer, the cell suspension was transferred (150  $\mu\text{L}$  per well) to black, clear-bottom,  
30 96-well microplates (Corning, USA), and optical density (600 nm) and GFP (475 nm  
31 excitation / 515 nm emission) or CFP (440 nm excitation / 500 nm emission) fluorescence

1 were measured with SpectraMax iD5 microplate reader (Molecular Devices, USA). Recorded  
2 fluorescence was normalized by cell density.

3

4 ***Confocal microscopy.*** Confocal microscopy was used to visually evaluate GFP-CtDoc or  
5 CFP-AcDoc binding to scaffoldin variants displayed with Ag43AT on the surface of EM42  
6 and EM371 strains. Cells bearing pSEVA238b\_ *ag43AT* were used as a negative control.  
7 After incubation with a purified fluorescent protein, a cell suspension was washed and diluted  
8 in TBS buffer, and 5  $\mu$ L were dropped on poly-L-lysine coated glass slides (Sigma-Aldrich,  
9 USA) and dried for 60 min at room temperature. Then, the cells were mounted with 5  $\mu$ L of  
10 ProLong antifade reagent (Thermo Fisher Scientific, USA), covered with cover glass, and the  
11 slides were analyzed using inverted confocal microscope Leica DMI8 S (Leica Microsystems,  
12 Germany) using a 100x oil immersion objective and 6x digital zoom.

13

14 ***SDS-PAGE and western blot analyses.*** CFEs and purified proteins for the evaluation of  
15 purification procedure were prepared as described in the section on *Protein purification by*  
16 *affinity chromatography*. Cell lysates for the evaluation of expression levels of recombinant  
17 proteins in *P. putida* EM42 and EM371 were prepared as follows. Cells, collected from 10  
18 mL of LB medium culture and washed with TBS buffer, were added with 250  $\mu$ L of B-PER  
19 Bacterial Protein Extraction Reagent, 0.25  $\mu$ L of lysozyme and 0.25  $\mu$ L of DNase I (all  
20 components from Thermo Fisher Scientific, USA) and lysed for 15 min at room temperature  
21 with slow agitation. For separation of soluble and insoluble fractions (section *Effect of*  
22 *scaffoldin and autotransporter expression on the viability of P. putida cells.*), cell lysates were  
23 centrifuged (21,000 g, 4  $^{\circ}$ C, 30 min), supernatants (CFE) were collected and pellets (insoluble  
24 fractions) were washed with distilled water, centrifuged and re-suspended in 50  $\mu$ L of distilled  
25 water. Samples of CFE, as well as samples of wash, elution, or insoluble fractions or purified  
26 chimeric proteins, were added with 5x Laemmli buffer, boiled at 100  $^{\circ}$ C for 7 min and  
27 separated by SDS-PAGE using 12 % gels. In all cases, 5  $\mu$ g of total protein were loaded per  
28 gel well. Gels were stained with Coomassie Brilliant Blue R-250 (Fluka/Sigma-Aldrich,  
29 Switzerland).

1 The staining step was omitted for western blot analyses. Samples of CFE or insoluble  
2 fractions (5  $\mu$ g of total protein per well) were loaded on 12 % polyacrylamide gel. After SDS-  
3 PAGE, proteins were electrotransferred during a 30-min interval from the gel onto an  
4 Immobilon-P membrane of pore size of 0.45  $\mu$ m (Merck Millipore, USA) under constant  
5 electric current of 0.1 A per gel and voltage of 5-7 V using Trans-Blot SD Semi-Dry Transfer  
6 Cell (Bio-Rad, USA). Alternatively, wet transfer was conducted under constant current of  
7 0.375 A per gel using Mini-PROTEAN Tetra Vertical Electrophoresis Cell (Bio-Rad, USA)  
8 during a 120-min interval. The membrane was blocked overnight at 4°C in PBS buffer with 3  
9 % (w/v) dry milk and 0.1 % (v/v) Tween 20 and then incubated with mouse anti-6xHis tag  
10 monoclonal antibody-HRP conjugate (Clontech or Thermo Fisher Scientific, USA) in the  
11 same buffer for 2 h at room temperature. PBS buffer with 1 % (v/v) Tween 20 was employed  
12 for membrane washing (4-times 5 min), and the proteins were then visualized with  
13 SuperSignal West Pico PLUS Chemiluminescent Substrate (Thermo Fisher Scientific, USA)  
14 using FUSION Solo S documentation system (Vilber, Germany).

15

16 ***Dot blot analysis.*** *P. putida* recombinants were cultured as described in section *Evaluation of*  
17 *scaffoldin display and cohesin-dockerin binding on P. putida cell surface by  $\beta$ -glucosidase*  
18 *activity assay*. Cells from 10 mL of LB medium culture were collected by centrifugation  
19 (2370 g, 4 °C, 5 min), washed twice with ice-cold TBS buffer with 0.05 % Tween 20 (TBS-T)  
20 and resuspended in 1 mL of the same buffer to the final OD<sub>600</sub> of 5.0. Cells were dotted (2  $\mu$ L  
21 per dot) on the nitrocellulose membrane of pore size of 0.45  $\mu$ m (Thermo Fisher Scientific,  
22 USA), and the membrane was dried at 30 °C for 15 min. The membrane was blocked in TBS  
23 buffer with 3 % (w/v) dry milk and 0.05 % (v/v) Tween 20 for 30 min at room temperature  
24 and then incubated with mouse anti-6xHis tag monoclonal antibody-HRP conjugate (Thermo  
25 Fisher Scientific, USA) in TBS-T with 0.05 % BSA for 2 h at room temperature. The  
26 membrane was washed 3 times for 5 min with TBS-T and once with TBS, and the His-tagged  
27 proteins on the cell surface were then visualized with SuperSignal West Pico PLUS  
28 Chemiluminescent Substrate (Thermo Fisher Scientific, USA) using FUSION Solo S  
29 documentation system (Vilber, Germany).

30

1 ***Growth of P. putida recombinants with surface-attached  $\beta$ -glucosidase in minimal medium***  
2 ***with cellobiose.*** Pre-induced *P. putida* EM42 and EM371 cells with displayed AcCoh-CtCoh  
3 scaffoldins were prepared as described above. EM42 and EM371 strains, bearing the  
4 pSEVA238b\_ags43AT plasmid, were used as negative controls. The cells (0.5 mL,  
5 OD<sub>600</sub>=10.0) were incubated with 25  $\mu$ L of purified BglC-CtDoc (1 mg mL<sup>-1</sup>) or with a  
6 mixture (1:1) of BglC-CtDoc and BglC-AcDoc (25  $\mu$ L each) at room temperature for 1 h. The  
7 suspension was washed three times with ice-cold TBS buffer with CaCl<sub>2</sub> and Tween 20, and  
8 the cells were used to inoculate wells of 96-well microtiter plate containing M9 minimal  
9 medium with 2 mM MgSO<sub>4</sub>, 100  $\mu$ M CaCl<sub>2</sub>, 20  $\mu$ M FeCl<sub>3</sub>, 2.5 mL L<sup>-1</sup> trace element  
10 solution,<sup>86</sup> and 5 g L<sup>-1</sup> D-cellobiose (the only carbon source). The plate with lid was incubated  
11 in a Tecan Infinite 200 Pro reader (Tecan, Switzerland) at 30 °C with discontinuous linear  
12 shaking, and absorbance at 600 nm was measured at 30 min intervals.

13

14 **Statistical analyses.** Experiments reported here were conducted at least in two biological  
15 replicates (the number of experiments and replicates is specified in figure legends). The mean  
16 values and corresponding standard deviations (SD) are presented. When appropriate, data  
17 were treated with a two-tailed Student's t test in Microsoft Office Excel 2013 (Microsoft  
18 Corp., USA), and confidence intervals were calculated for a given parameter to manifest a  
19 statistically significant difference in means between two experimental datasets.

20

## 21 **Associated Content**

22 Supporting Information

## 23 **Notes**

24 The authors declare no competing financial interest.

## 25 **ORCID**

26 Pavel Dvořák ORCID ID: 0000-0002-3215-4763

27 Edward A. Bayer ORCID ID: 0000-0001-7749-5150

28 Víctor de Lorenzo ORCID ID: 0000-0002-6041-2731

1

## 2 **Acknowledgements**

3 We thank Prof. Alfredo Martinez from Universidad Nacional Autónoma de México for  
4 provided pAg43pol construct, we thank Dr. Sarah Morais and Dr. Johanna Stern from  
5 Weizmann Institute of Science, Israel, for valuable discussions and help with the ELISA  
6 technique, we thank Dr. Esteban Martínez-García from CNB-CSIC, Spain, for providing *P.*  
7 *putida* EM371 strain and valuable discussions, we also thank Microscopy department of  
8 CNB-CSIC for the help with confocal microscopy.

9

## 10 **Funding**

11 This work was funded by the MADONNA (H2020-FET-OPEN-RIA-2017-1-766975),  
12 BioRoboost (H2020-NMBP-BIO-CSA-2018), SYN BIO4FLAV (H2020-NMBP/0500) and  
13 MIX-UP (H2020-Grant 870294) Contracts of the European Union and the S2017/BMD-3691  
14 InGEMICS-CM Project of the Comunidad de Madrid (European Structural and Investment  
15 Funds) as well .well as by the Czech Science Foundation (19-06511Y).

16

## 17 **References**

18

- 19 (1) Blank, L. M.; Narancic, T.; Mampel, J.; Tiso, T.; O'Connor, K. Biotechnological  
20 Upcycling of Plastic Waste and Other Non-Conventional Feedstocks in a Circular  
21 Economy. *Curr. Opin. Biotechnol.* **2020**, *62*, 212–219.  
22 <https://doi.org/10.1016/j.copbio.2019.11.011>.
- 23 (2) Baral, N. R.; Sundstrom, E. R.; Das, L.; Gladden, J.; Eudes, A.; Mortimer, J. C.;  
24 Singer, S. W.; Mukhopadhyay, A.; Scown, C. D. Approaches for More Efficient  
25 Biological Conversion of Lignocellulosic Feedstocks to Biofuels and Bioproducts. *ACS*  
26 *Sustain. Chem. Eng.* **2019**, *7* (10), 9062–9079.  
27 <https://doi.org/10.1021/acssuschemeng.9b01229>.
- 28 (3) Peabody, G. L.; Elmore, J. R.; Martinez-Baird, J.; Guss, A. M. Engineered  
29 *Pseudomonas putida* KT2440 Co-Utilizes Galactose and Glucose. *Biotechnol. Biofuels*  
30 **2019**, *12* (1), 295. <https://doi.org/10.1186/s13068-019-1627-0>.

- 1 (4) Dvořák, P.; de Lorenzo, V. Refactoring the Upper Sugar Metabolism of *Pseudomonas*  
2 *putida* for Co-Utilization of Cellobiose, Xylose, and Glucose. *Metab. Eng.* **2018**, *48*,  
3 94–108. <https://doi.org/10.1016/j.ymben.2018.05.019>.
- 4 (5) Löwe, H.; Sinner, P.; Kremling, A.; Pflüger-Grau, K. Engineering Sucrose Metabolism  
5 in *Pseudomonas putida* Highlights the Importance of Porins. *Microb. Biotechnol.* **2020**,  
6 *13* (1), 97–106. <https://doi.org/10.1111/1751-7915.13283>.
- 7 (6) Salvachúa, D.; Rydzak, T.; Auwae, R.; De Capite, A.; Black, B. A.; Bouvier, J. T.;  
8 Cleveland, N. S.; Elmore, J. R.; Huenemann, J. D.; Katahira, R.; Michener, W. E.;  
9 Peterson, D. J.; Rohrer, H.; Vardon, D. R.; Beckham, G. T.; Guss, A. M. Metabolic  
10 Engineering of *Pseudomonas putida* for Increased Polyhydroxyalkanoate Production  
11 from Lignin. *Microb. Biotechnol.* **2020**, *13* (1), 290–298. <https://doi.org/10.1111/1751-7915.13481>.
- 12  
13 (7) Kohlstedt, M.; Starck, S.; Barton, N.; Stolzenberger, J.; Selzer, M.; Mehlmann, K.;  
14 Schneider, R.; Pleissner, D.; Rinkel, J.; Dickschat, J. S.; Venus, J.; B J H van Duuren,  
15 J.; Wittmann, C. From Lignin to Nylon: Cascaded Chemical and Biochemical  
16 Conversion Using Metabolically Engineered *Pseudomonas putida*. *Metab. Eng.* **2018**,  
17 *47*, 279–293. <https://doi.org/10.1016/j.ymben.2018.03.003>.
- 18 (8) Franden, M. A.; Jayakody, L. N.; Li, W.-J.; Wagner, N. J.; Cleveland, N. S.; Michener,  
19 W. E.; Hauer, B.; Blank, L. M.; Wierckx, N.; Klebensberger, J.; Beckham, G. T.  
20 Engineering *Pseudomonas putida* KT2440 for Efficient Ethylene Glycol Utilization.  
21 *Metab. Eng.* **2018**, *48*, 197–207. <https://doi.org/10.1016/j.ymben.2018.06.003>.
- 22 (9) Molina, L.; Rosa, R. L.; Nogales, J.; Rojo, F. *Pseudomonas putida* KT2440  
23 Metabolism Undergoes Sequential Modifications during Exponential Growth in a  
24 Complete Medium as Compounds Are Gradually Consumed. *Environ. Microbiol.* **2019**,  
25 *21* (7), 2375–2390. <https://doi.org/10.1111/1462-2920.14622>.
- 26 (10) Kukurugya, M. A.; Mendonca, C. M.; Solhtalab, M.; Wilkes, R. A.; Thannhauser, T.  
27 W.; Aristilde, L. Multi-Omics Analysis Unravels a Segregated Metabolic Flux Network  
28 That Tunes Co-Utilization of Sugar and Aromatic Carbons in *Pseudomonas putida*. *J.*  
29 *Biol. Chem.* **2019**, jbc.RA119.007885. <https://doi.org/10.1074/jbc.RA119.007885>.
- 30 (11) Kampers, L. F. C.; Volkers, R. J. M.; Martins dos Santos, V. A. P. *Pseudomonas putida*  
31 KT2440 Is HV1 Certified, Not GRAS. *Microb. Biotechnol.* **2019**, *12* (5), 845–848.  
32 <https://doi.org/10.1111/1751-7915.13443>.
- 33 (12) Nogales, J.; Mueller, J.; Gudmundsson, S.; Canalejo, F. J.; Duque, E.; Monk, J.; Feist,  
34 A. M.; Ramos, J. L.; Niu, W.; Palsson, B. O. High-Quality Genome-Scale Metabolic

- 1 Modelling of *Pseudomonas putida* Highlights Its Broad Metabolic Capabilities.  
2 *Environ. Microbiol.* **2020**, *22* (1), 255–269. <https://doi.org/10.1111/1462-2920.14843>.
- 3 (13) Horlamus, F.; Wang, Y.; Steinbach, D.; Vahidinasab, M.; Wittgens, A.; Rosenau, F.;  
4 Henkel, M.; Hausmann, R. Potential of Biotechnological Conversion of Lignocellulose  
5 Hydrolyzates by *Pseudomonas putida* KT2440 as a Model Organism for a Bio-Based  
6 Economy. *GCB Bioenergy* **2019**, *11* (12), 1421–1434.  
7 <https://doi.org/10.1111/gcbb.12647>.
- 8 (14) Jayakody, L. N.; Johnson, C. W.; Whitham, J. M.; Giannone, R. J.; Black, B. A.;  
9 Cleveland, N. S.; Klingeman, D. M.; Michener, W. E.; Olstad, J. L.; Vardon, D. R.;  
10 Brown, R. C.; Brown, S. D.; Hettich, R. L.; Guss, A. M.; Beckham, G. T.  
11 Thermochemical Wastewater Valorization via Enhanced Microbial Toxicity Tolerance.  
12 *Energy Environ. Sci.* **2018**, *11* (6), 1625–1638. <https://doi.org/10.1039/C8EE00460A>.
- 13 (15) Poblete-Castro, I.; Becker, J.; Dohnt, K.; dos Santos, V. M.; Wittmann, C. Industrial  
14 Biotechnology of *Pseudomonas putida* and Related Species. *Appl. Microbiol.*  
15 *Biotechnol.* **2012**, *93* (6), 2279–2290. <https://doi.org/10.1007/s00253-012-3928-0>.
- 16 (16) Sánchez-Pascuala, A.; de Lorenzo, V.; Nikel, P. I. Refactoring the Embden–Meyerhof–  
17 Parnas Pathway as a Whole of Portable GlucoBricks for Implantation of Glycolytic  
18 Modules in Gram-Negative Bacteria. *ACS Synth. Biol.* **2017**, *6* (5), 793–805.  
19 <https://doi.org/10.1021/acssynbio.6b00230>.
- 20 (17) Nikel, P. I.; de Lorenzo, V. *Pseudomonas putida* as a Functional Chassis for Industrial  
21 Biocatalysis: From Native Biochemistry to Trans-Metabolism. *Metab. Eng.* **2018**, *50*,  
22 142–155. <https://doi.org/10.1016/j.ymben.2018.05.005>.
- 23 (18) Martínez-García, E.; de Lorenzo, V. Molecular Tools and Emerging Strategies for  
24 Deep Genetic/Genomic Refactoring of *Pseudomonas*. *Curr. Opin. Biotechnol.* **2017**,  
25 *47*, 120–132. <https://doi.org/10.1016/j.copbio.2017.06.013>.
- 26 (19) Xu, Q.; Resch, M. G.; Podkaminer, K.; Yang, S.; Baker, J. O.; Donohoe, B. S.; Wilson,  
27 C.; Klingeman, D. M.; Olson, D. G.; Decker, S. R.; Giannone, R. J.; Hettich, R. L.;  
28 Brown, S. D.; Lynd, L. R.; Bayer, E. A.; Himmel, M. E.; Bomble, Y. J. Dramatic  
29 Performance of *Clostridium thermocellum* Explained by Its Wide Range of Cellulase  
30 Modalities. *Sci. Adv.* **2016**, *2* (2), e1501254. <https://doi.org/10.1126/sciadv.1501254>.
- 31 (20) Adams, J. J.; Pal, G.; Jia, Z.; Smith, S. P. Mechanism of Bacterial Cell-Surface  
32 Attachment Revealed by the Structure of Cellulosomal Type II Cohesin-Dockerin  
33 Complex. *Proc. Natl. Acad. Sci.* **2006**, *103* (2), 305–310.  
34 <https://doi.org/10.1073/pnas.0507109103>.



- 1 (21) Schoeler, C.; Malinowska, K. H.; Bernardi, R. C.; Milles, L. F.; Jobst, M. A.; Durner,  
2 E.; Ott, W.; Fried, D. B.; Bayer, E. A.; Schulten, K.; Gaub, H. E.; Nash, M. A.  
3 Ultrastable Cellulosome-Adhesion Complex Tightens under Load. *Nat. Commun.* **2014**,  
4 5 (1), 1–8. <https://doi.org/10.1038/ncomms6635>.
- 5 (22) Gunnoo, M.; Cazade, P.-A.; Bayer, E. A.; Thompson, D. Molecular Simulations Reveal  
6 That a Short Helical Loop Regulates Thermal Stability of Type I Cohesin-Dockerin  
7 Complexes. *Phys. Chem. Chem. Phys. PCCP* **2018**, 20 (45), 28445–28451.  
8 <https://doi.org/10.1039/c8cp04800b>.
- 9 (23) Demain, A. L.; Newcomb, M.; Wu, J. H. D. Cellulase, Clostridia, and Ethanol.  
10 *Microbiol. Mol. Biol. Rev. MMBR* **2005**, 69 (1), 124–154.  
11 <https://doi.org/10.1128/MMBR.69.1.124-154.2005>.
- 12 (24) Artzi, L.; Bayer, E. A.; Moraš, S. Cellulosomes: Bacterial Nanomachines for  
13 Dismantling Plant Polysaccharides. *Nat. Rev. Microbiol.* **2017**, 15 (2), 83–95.  
14 <https://doi.org/10.1038/nrmicro.2016.164>.
- 15 (25) Fierobe, H.-P.; Mingardon, F.; Mechaly, A.; Bélaïch, A.; Rincon, M. T.; Pagès, S.;  
16 Lamed, R.; Tardif, C.; Bélaïch, J.-P.; Bayer, E. A. Action of Designer Cellulosomes on  
17 Homogeneous Versus Complex Substrates Controlled Incorporation of Three Distinct  
18 Enzymes Into a Defined Trifunctional Scaffoldin. *J. Biol. Chem.* **2005**, 280 (16),  
19 16325–16334. <https://doi.org/10.1074/jbc.M414449200>.
- 20 (26) Arfi, Y.; Shamshoum, M.; Rogachev, I.; Peleg, Y.; Bayer, E. A. Integration of Bacterial  
21 Lytic Polysaccharide Monooxygenases into Designer Cellulosomes Promotes  
22 Enhanced Cellulose Degradation. *Proc. Natl. Acad. Sci. U. S. A.* **2014**, 111 (25), 9109–  
23 9114. <https://doi.org/10.1073/pnas.1404148111>.
- 24 (27) You, C.; Zhang, Y.-H. P. Annexation of a High-Activity Enzyme in a Synthetic Three-  
25 Enzyme Complex Greatly Decreases the Degree of Substrate Channeling. *ACS Synth.*  
26 *Biol.* **2014**, 3 (6), 380–386. <https://doi.org/10.1021/sb4000993>.
- 27 (28) Tsai, S.-L.; DaSilva, N. A.; Chen, W. Functional Display of Complex Cellulosomes on  
28 the Yeast Surface via Adaptive Assembly. *ACS Synth. Biol.* **2013**, 2 (1), 14–21.  
29 <https://doi.org/10.1021/sb300047u>.
- 30 (29) Cho, H.-Y.; Yukawa, H.; Inui, M.; Doi, R. H.; Wong, S.-L. Production of  
31 Minicellulosomes from *Clostridium cellulovorans* in *Bacillus subtilis* WB800. *Appl.*  
32 *Environ. Microbiol.* **2004**, 70 (9), 5704–5707. [https://doi.org/10.1128/AEM.70.9.5704-](https://doi.org/10.1128/AEM.70.9.5704-5707.2004)  
33 5707.2004.

- 1 (30) Wen, F.; Sun, J.; Zhao, H. Yeast Surface Display of Trifunctional Minicellulosomes for  
2 Simultaneous Saccharification and Fermentation of Cellulose to Ethanol. *Appl.*  
3 *Environ. Microbiol.* **2010**, *76* (4), 1251–1260. <https://doi.org/10.1128/AEM.01687-09>.
- 4 (31) Arai, T.; Matsuoka, S.; Cho, H.-Y.; Yukawa, H.; Inui, M.; Wong, S.-L.; Doi, R. H.  
5 Synthesis of *Clostridium cellulovorans* Minicellulosomes by Intercellular  
6 Complementation. *Proc. Natl. Acad. Sci. U. S. A.* **2007**, *104* (5), 1456–1460.  
7 <https://doi.org/10.1073/pnas.0610740104>.
- 8 (32) Stern, J.; Moraïs, S.; Ben-David, Y.; Salama, R.; Shamsoum, M.; Lamed, R.; Shoham,  
9 Y.; Bayer, E. A.; Mizrahi, I. Assembly of Synthetic Functional Cellulosomal Structures  
10 onto the Cell Surface of *Lactobacillus plantarum*, a Potent Member of the Gut  
11 Microbiome. *Appl. Environ. Microbiol.* **2018**, *84* (8).  
12 <https://doi.org/10.1128/AEM.00282-18>.
- 13 (33) Fan, L.-H.; Zhang, Z.-J.; Yu, X.-Y.; Xue, Y.-X.; Tan, T.-W. Self-Surface Assembly of  
14 Cellulosomes with Two Miniscaffoldins on *Saccharomyces cerevisiae* for Cellulosic  
15 Ethanol Production. *Proc. Natl. Acad. Sci. U. S. A.* **2012**, *109* (33), 13260–13265.  
16 <https://doi.org/10.1073/pnas.1209856109>.
- 17 (34) Perret, S.; Casalot, L.; Fierobe, H.-P.; Tardif, C.; Sabathe, F.; Belaich, J.-P.; Belaich, A.  
18 Production of Heterologous and Chimeric Scaffoldins by *Clostridium acetobutylicum*  
19 ATCC 824. *J. Bacteriol.* **2004**, *186* (1), 253–257. [https://doi.org/10.1128/jb.186.1.253-](https://doi.org/10.1128/jb.186.1.253-257.2004)  
20 [257.2004](https://doi.org/10.1128/jb.186.1.253-257.2004).
- 21 (35) Wieczorek, A. S.; Martin, V. J. J. Effects of Synthetic Cohesin-Containing Scaffold  
22 Protein Architecture on Binding Dockerin-Enzyme Fusions on the Surface of  
23 *Lactococcus lactis*. *Microb. Cell Factories* **2012**, *11*, 160. [https://doi.org/10.1186/1475-](https://doi.org/10.1186/1475-2859-11-160)  
24 [2859-11-160](https://doi.org/10.1186/1475-2859-11-160).
- 25 (36) Bokinsky, G.; Peralta-Yahya, P. P.; George, A.; Holmes, B. M.; Steen, E. J.; Dietrich,  
26 J.; Lee, T. S.; Tullman-Ercek, D.; Voigt, C. A.; Simmons, B. A.; Keasling, J. D.  
27 Synthesis of Three Advanced Biofuels from Ionic Liquid-Pretreated Switchgrass Using  
28 Engineered *Escherichia coli*. *Proc. Natl. Acad. Sci. U. S. A.* **2011**, *108* (50), 19949–  
29 19954. <https://doi.org/10.1073/pnas.1106958108>.
- 30 (37) Wargacki, A. J.; Leonard, E.; Win, M. N.; Regitsky, D. D.; Santos, C. N. S.; Kim, P.  
31 B.; Cooper, S. R.; Raisner, R. M.; Herman, A.; Sivitz, A. B.; Lakshmanaswamy, A.;  
32 Kashiya, Y.; Baker, D.; Yoshikuni, Y. An Engineered Microbial Platform for Direct  
33 Biofuel Production from Brown Macroalgae. *Science* **2012**, *335* (6066), 308–313.  
34 <https://doi.org/10.1126/science.1214547>.

- 1 (38) Muñoz-Gutiérrez, I.; Moss-Acosta, C.; Trujillo-Martinez, B.; Gosset, G.; Martinez, A.  
2 Ag43-Mediated Display of a Thermostable  $\beta$ -Glucosidase in *Escherichia coli* and Its  
3 Use for Simultaneous Saccharification and Fermentation at High Temperatures.  
4 *Microb. Cell Factories* **2014**, *13*, 106. <https://doi.org/10.1186/s12934-014-0106-3>.
- 5 (39) Tanaka, T.; Hirata, Y.; Nakano, M.; Kawabata, H.; Kondo, A. Creation of Cellobiose  
6 and Xylooligosaccharides-Coupling *Escherichia coli* Displaying Both  $\beta$ -Glucosidase  
7 and  $\beta$ -Xylosidase on Its Cell Surface. *ACS Synth. Biol.* **2014**, *3* (7), 446–453.  
8 <https://doi.org/10.1021/sb400070q>.
- 9 (40) Tozakidis, I. E. P.; Brossette, T.; Lenz, F.; Maas, R. M.; Jose, J. Proof of Concept for  
10 the Simplified Breakdown of Cellulose by Combining *Pseudomonas putida* Strains  
11 with Surface Displayed Thermophilic Endocellulase, Exocellulase and  $\beta$ -Glucosidase.  
12 *Microb. Cell Factories* **2016**, *15* (1), 103. <https://doi.org/10.1186/s12934-016-0505-8>.
- 13 (41) Schulte, M. F.; Tozakidis, I. E. P.; Jose, J. Autotransporter-Based Surface Display of  
14 Hemicellulases on *Pseudomonas putida*: Whole-Cell Biocatalysts for the Degradation  
15 of Biomass. *ChemCatChem* **2017**, *9* (20), 3955–3964.  
16 <https://doi.org/10.1002/cctc.201700577>.
- 17 (42) Morañs, S.; Shterzer, N.; Lamed, R.; Bayer, E. A.; Mizrahi, I. A Combined Cell-  
18 Consortium Approach for Lignocellulose Degradation by Specialized *Lactobacillus*  
19 *plantarum* Cells. *Biotechnol. Biofuels* **2014**, *7*, 112. [https://doi.org/10.1186/1754-6834-](https://doi.org/10.1186/1754-6834-7-112)  
20 [7-112](https://doi.org/10.1186/1754-6834-7-112).
- 21 (43) Lee, S. Y.; Choi, J. H.; Xu, Z. Microbial Cell-Surface Display. *Trends Biotechnol.*  
22 **2003**, *21* (1), 45–52. [https://doi.org/10.1016/s0167-7799\(02\)00006-9](https://doi.org/10.1016/s0167-7799(02)00006-9).
- 23 (44) Martínez-García, E.; Nikel, P. I.; Aparicio, T.; de Lorenzo, V. *Pseudomonas* 2.0:  
24 Genetic Upgrading of *P. putida* KT2440 as an Enhanced Host for Heterologous Gene  
25 Expression. *Microb. Cell Factories* **2014**, *13*, 159. [https://doi.org/10.1186/s12934-014-](https://doi.org/10.1186/s12934-014-0159-3)  
26 [0159-3](https://doi.org/10.1186/s12934-014-0159-3).
- 27 (45) Lieder, S.; Nikel, P. I.; de Lorenzo, V.; Takors, R. Genome Reduction Boosts  
28 Heterologous Gene Expression in *Pseudomonas putida*. *Microb. Cell Factories* **2015**,  
29 *14*, 23. <https://doi.org/10.1186/s12934-015-0207-7>.
- 30 (46) Martínez-García, E.; Fraile, S.; Rodríguez Espeso, D.; Vecchiotti, D.; Bertoni, G.; de  
31 Lorenzo, V. The Naked Cell: Emerging Properties of a Surface-Streamlined  
32 *Pseudomonas putida* Strain. 2020, In preparation.
- 33 (47) Vazana, Y.; Barak, Y.; Unger, T.; Peleg, Y.; Shamshoum, M.; Ben-Yehzekel, T.;  
34 Mazor, Y.; Shapiro, E.; Lamed, R.; Bayer, E. A. A Synthetic Biology Approach for

- 1 Evaluating the Functional Contribution of Designer Cellulosome Components to  
2 Deconstruction of Cellulosic Substrates. *Biotechnol. Biofuels* **2013**, *6* (1), 182.  
3 <https://doi.org/10.1186/1754-6834-6-182>.
- 4 (48) Ramos, J. L.; Gonzalez-Carrero, M.; Timmis, K. N. Broad-Host Range Expression  
5 Vectors Containing Manipulated Meta-Cleavage Pathway Regulatory Elements of the  
6 TOL Plasmid. *FEBS Lett.* **1988**, *226* (2), 241–246. [https://doi.org/10.1016/0014-5793\(88\)81431-5](https://doi.org/10.1016/0014-5793(88)81431-5).
- 7  
8 (49) Weinel, C.; Nelson, K. E.; Tümmler, B. Global Features of the *Pseudomonas putida*  
9 KT2440 Genome Sequence. *Environ. Microbiol.* **2002**, *4* (12), 809–818.  
10 <https://doi.org/10.1046/j.1462-2920.2002.00331.x>.
- 11 (50) Grote, A.; Hiller, K.; Scheer, M.; Münch, R.; Nörtemann, B.; Hempel, D. C.; Jahn, D.  
12 JCat: A Novel Tool to Adapt Codon Usage of a Target Gene to Its Potential Expression  
13 Host. *Nucleic Acids Res.* **2005**, *33* (Web Server issue), W526–W531.  
14 <https://doi.org/10.1093/nar/gki376>.
- 15 (51) Meuskens, I.; Michalik, M.; Chauhan, N.; Linke, D.; Leo, J. C. A New Strain  
16 Collection for Improved Expression of Outer Membrane Proteins. *Front. Cell. Infect.*  
17 *Microbiol.* **2017**, *7*, 464. <https://doi.org/10.3389/fcimb.2017.00464>.
- 18 (52) Jong, W. S. P.; Schillemans, M.; Hagen-Jongman, C. M. ten; Luirink, J.; Ulsen, P. van.  
19 Comparing Autotransporter  $\beta$ -Domain Configurations for Their Capacity to Secrete  
20 Heterologous Proteins to the Cell Surface. *PLOS ONE* **2018**, *13* (2), e0191622.  
21 <https://doi.org/10.1371/journal.pone.0191622>.
- 22 (53) Rutherford, N.; Mourez, M. Surface Display of Proteins by Gram-Negative Bacterial  
23 Autotransporters. *Microb. Cell Factories* **2006**, *5*, 22. <https://doi.org/10.1186/1475-2859-5-22>.
- 24  
25 (54) Tozakidis, I. E. P.; Sichert, S.; Jose, J. Going beyond E. Coli: Autotransporter Based  
26 Surface Display on Alternative Host Organisms. *New Biotechnol.* **2015**, *32* (6), 644–  
27 650. <https://doi.org/10.1016/j.nbt.2014.12.008>.
- 28 (55) Wells, T. J.; Sherlock, O.; Rivas, L.; Mahajan, A.; Beatson, S. A.; Torpdahl, M.; Webb,  
29 R. I.; Allsopp, L. P.; Gobius, K. S.; Gally, D. L.; Schembri, M. A. EhaA Is a Novel  
30 Autotransporter Protein of Enterohemorrhagic *Escherichia coli* O157:H7 That  
31 Contributes to Adhesion and Biofilm Formation. *Environ. Microbiol.* **2008**, *10* (3),  
32 589–604. <https://doi.org/10.1111/j.1462-2920.2007.01479.x>.

- 1 (56) Leščić Ašler, I.; Ivić, N.; Kovačić, F.; Schell, S.; Knorr, J.; Krauss, U.; Wilhelm, S.;  
2 Kojić-Prodić, B.; Jaeger, K.-E. Probing Enzyme Promiscuity of SGNH Hydrolases.  
3 *ChemBioChem* **2010**, *11* (15), 2158–2167. <https://doi.org/10.1002/cbic.201000398>.
- 4 (57) Klauser, T.; Pohlner, J.; Meyer, T. F. Extracellular Transport of Cholera Toxin B  
5 Subunit Using Neisseria IgA Protease Beta-Domain: Conformation-Dependent Outer  
6 Membrane Translocation. *EMBO J.* **1990**, *9* (6), 1991–1999.
- 7 (58) Freudl, R. Signal Peptides for Recombinant Protein Secretion in Bacterial Expression  
8 Systems. *Microb. Cell Factories* **2018**, *17* (1), 52. [https://doi.org/10.1186/s12934-018-](https://doi.org/10.1186/s12934-018-0901-3)  
9 [0901-3](https://doi.org/10.1186/s12934-018-0901-3).
- 10 (59) Veiga, E.; de Lorenzo, V.; Fernández, L. A. Autotransporters as Scaffolds for Novel  
11 Bacterial Adhesins: Surface Properties of *Escherichia coli* Cells Displaying Jun/Fos  
12 Dimerization Domains. *J. Bacteriol.* **2003**, *185* (18), 5585–5590.
- 13 (60) Kjaergaard, K.; Hasman, H.; Schembri, M. A.; Klemm, P. Antigen 43-Mediated  
14 Autotransporter Display, a Versatile Bacterial Cell Surface Presentation System. *J.*  
15 *Bacteriol.* **2002**, *184* (15), 4197–4204. [https://doi.org/10.1128/jb.184.15.4197-](https://doi.org/10.1128/jb.184.15.4197-4204.2002)  
16 [4204.2002](https://doi.org/10.1128/jb.184.15.4197-4204.2002).
- 17 (61) Wentzel, A.; Christmann, A.; Adams, T.; Kolmar, H. Display of Passenger Proteins on  
18 the Surface of *Escherichia coli* K-12 by the Enterohemorrhagic *E. coli* Intimin EaeA. *J.*  
19 *Bacteriol.* **2001**, *183* (24), 7273–7284. [https://doi.org/10.1128/JB.183.24.7273-](https://doi.org/10.1128/JB.183.24.7273-7284.2001)  
20 [7284.2001](https://doi.org/10.1128/JB.183.24.7273-7284.2001).
- 21 (62) Salema, V.; Marín, E.; Martínez-Arteaga, R.; Ruano-Gallego, D.; Fraile, S.; Margolles,  
22 Y.; Teira, X.; Gutierrez, C.; Bodelón, G.; Fernández, L. Á. Selection of Single Domain  
23 Antibodies from Immune Libraries Displayed on the Surface of *E. coli* Cells with Two  
24  $\beta$ -Domains of Opposite Topologies. *PloS One* **2013**, *8* (9), e75126.  
25 <https://doi.org/10.1371/journal.pone.0075126>.
- 26 (63) Tozakidis, I. E. P.; Lüken, L. M.; Üffing, A.; Meyers, A.; Jose, J. Improving the  
27 Autotransporter-Based Surface Display of Enzymes in *Pseudomonas putida* KT2440.  
28 *Microb. Biotechnol.* **2020**, *13* (1), 176–184. <https://doi.org/10.1111/1751-7915.13419>.
- 29 (64) Wagner, S.; Bader, M. L.; Drew, D.; de Gier, J.-W. Rationalizing Membrane Protein  
30 Overexpression. *Trends Biotechnol.* **2006**, *24* (8), 364–371.  
31 <https://doi.org/10.1016/j.tibtech.2006.06.008>.
- 32 (65) Schlegel, S.; Rujas, E.; Ytterberg, A. J.; Zubarev, R. A.; Luirink, J.; de Gier, J.-W.  
33 Optimizing Heterologous Protein Production in the Periplasm of *E. coli* by Regulating

- 1 Gene Expression Levels. *Microb. Cell Factories* **2013**, *12*, 24.  
2 <https://doi.org/10.1186/1475-2859-12-24>.
- 3 (66) Van Gerven, N.; Sleutel, M.; Deboeck, F.; De Greve, H.; Hernalsteens, J.-P. Surface  
4 Display of the Receptor-Binding Domain of the F17a-G Fimbrial Adhesin through the  
5 Autotransporter AIDA-I Leads to Permeability of Bacterial Cells. *Microbiol. Read.*  
6 *Engl.* **2009**, *155* (Pt 2), 468–476. <https://doi.org/10.1099/mic.0.022327-0>.
- 7 (67) Valls, M.; de Lorenzo, V.; González-Duarte, R.; Atrian, S. Engineering Outer-  
8 Membrane Proteins in *Pseudomonas putida* for Enhanced Heavy-Metal Bioadsorption.  
9 *J. Inorg. Biochem.* **2000**, *79* (1–4), 219–223. [https://doi.org/10.1016/s0162-](https://doi.org/10.1016/s0162-0134(99)00170-1)  
10 [0134\(99\)00170-1](https://doi.org/10.1016/s0162-0134(99)00170-1).
- 11 (68) van der Woude, M. W.; Henderson, I. R. Regulation and Function of Ag43 (Flu). *Annu.*  
12 *Rev. Microbiol.* **2008**, *62*, 153–169.  
13 <https://doi.org/10.1146/annurev.micro.62.081307.162938>.
- 14 (69) Ahan, R. E.; Kırpat, B. M.; Saltepe, B.; Şeker, U. Ö. Ş. A Self-Actuated Cellular  
15 Protein Delivery Machine. *ACS Synth. Biol.* **2019**, *8* (4), 686–696.  
16 <https://doi.org/10.1021/acssynbio.9b00062>.
- 17 (70) Shaner, N. C.; Steinbach, P. A.; Tsien, R. Y. A Guide to Choosing Fluorescent  
18 Proteins. *Nat. Methods* **2005**, *2* (12), 905–909. <https://doi.org/10.1038/nmeth819>.
- 19 (71) Laloux, G.; Jacobs-Wagner, C. How Do Bacteria Localize Proteins to the Cell Pole? *J.*  
20 *Cell Sci.* **2014**, *127* (1), 11–19. <https://doi.org/10.1242/jcs.138628>.
- 21 (72) Hörnström, D.; Larsson, G.; van Maris, A. J. A.; Gustavsson, M. Molecular  
22 Optimization of Autotransporter-Based Tyrosinase Surface Display. *Biochim. Biophys.*  
23 *Acta BBA - Biomembr.* **2019**, *1861* (2), 486–494.  
24 <https://doi.org/10.1016/j.bbamem.2018.11.012>.
- 25 (73) Klemm, P.; Hjerrild, L.; Gjermansen, M.; Schembri, M. A. Structure-Function Analysis  
26 of the Self-Recognizing Antigen 43 Autotransporter Protein from *Escherichia coli*.  
27 *Mol. Microbiol.* **2004**, *51* (1), 283–296. [https://doi.org/10.1046/j.1365-](https://doi.org/10.1046/j.1365-2958.2003.03833.x)  
28 [2958.2003.03833.x](https://doi.org/10.1046/j.1365-2958.2003.03833.x).
- 29 (74) Sørensen, A.; Lübeck, M.; Lübeck, P. S.; Ahring, B. K. Fungal Beta-Glucosidases: A  
30 Bottleneck in Industrial Use of Lignocellulosic Materials. *Biomolecules* **2013**, *3* (3),  
31 612–631. <https://doi.org/10.3390/biom3030612>.
- 32 (75) Gefen, G.; Anbar, M.; Morag, E.; Lamed, R.; Bayer, E. A. Enhanced Cellulose  
33 Degradation by Targeted Integration of a Cohesin-Fused  $\beta$ -Glucosidase into the

- 1 *Clostridium thermocellum* Cellulosome. *Proc. Natl. Acad. Sci. U. S. A.* **2012**, *109* (26),  
2 10298–10303. <https://doi.org/10.1073/pnas.1202747109>.
- 3 (76) Zhang, Y.-H. P. Substrate Channeling and Enzyme Complexes for Biotechnological  
4 Applications. *Biotechnol. Adv.* **2011**, *29* (6), 715–725.  
5 <https://doi.org/10.1016/j.biotechadv.2011.05.020>.
- 6 (77) Smit, J.; Kamio, Y.; Nikaido, H. Outer Membrane of Salmonella Typhimurium:  
7 Chemical Analysis and Freeze-Fracture Studies with Lipopolysaccharide Mutants. *J.*  
8 *Bacteriol.* **1975**, *124* (2), 942–958.
- 9 (78) Jose, J.; Bernhardt, R.; Hannemann, F. Cellular Surface Display of Dimeric Adx and  
10 Whole Cell P450-Mediated Steroid Synthesis on *E. coli*. *J. Biotechnol.* **2002**, *95* (3),  
11 257–268. [https://doi.org/10.1016/s0168-1656\(02\)00030-5](https://doi.org/10.1016/s0168-1656(02)00030-5).
- 12 (79) Kahn, A.; Moraïs, S.; Galanopoulou, A. P.; Chung, D.; Sarai, N. S.; Hengge, N.;  
13 Hatzinikolaou, D. G.; Himmel, M. E.; Bomble, Y. J.; Bayer, E. A. Creation of a  
14 Functional Hyperthermostable Designer Cellulosome. *Biotechnol. Biofuels* **2019**, *12*  
15 (1), 44. <https://doi.org/10.1186/s13068-019-1386-y>.
- 16 (80) Hammel, M.; Fierobe, H.-P.; Czjzek, M.; Kurkal, V.; Smith, J. C.; Bayer, E. A.; Finet,  
17 S.; Receveur-Bréchet, V. Structural Basis of Cellulosome Efficiency Explored by  
18 Small Angle X-Ray Scattering. *J. Biol. Chem.* **2005**, *280* (46), 38562–38568.  
19 <https://doi.org/10.1074/jbc.M503168200>.
- 20 (81) Becker, S.; Theile, S.; Heppeler, N.; Michalczyk, A.; Wentzel, A.; Wilhelm, S.; Jaeger,  
21 K.-E.; Kolmar, H. A Generic System for the *Escherichia coli* Cell-Surface Display of  
22 Lipolytic Enzymes. *FEBS Lett.* **2005**, *579* (5), 1177–1182.  
23 <https://doi.org/10.1016/j.febslet.2004.12.087>.
- 24 (82) Minty, J. J.; Singer, M. E.; Scholz, S. A.; Bae, C.-H.; Ahn, J.-H.; Foster, C. E.; Liao, J.  
25 C.; Lin, X. N. Design and Characterization of Synthetic Fungal-Bacterial Consortia for  
26 Direct Production of Isobutanol from Cellulosic Biomass. *Proc. Natl. Acad. Sci.* **2013**,  
27 *110* (36), 14592–14597. <https://doi.org/10.1073/pnas.1218447110>.
- 28 (83) Zhang, S.; Merino, N.; Okamoto, A.; Gedalanga, P. Interkingdom Microbial Consortia  
29 Mechanisms to Guide Biotechnological Applications. *Microb. Biotechnol.* **2018**, *11* (5),  
30 833–847. <https://doi.org/10.1111/1751-7915.13300>.
- 31 (84) Honjo, H.; Iwasaki, K.; Soma, Y.; Tsuruno, K.; Hamada, H.; Hanai, T. Synthetic  
32 Microbial Consortium with Specific Roles Designated by Genetic Circuits for  
33 Cooperative Chemical Production. *Metab. Eng.* **2019**, *55*, 268–275.  
34 <https://doi.org/10.1016/j.ymben.2019.08.007>.

- 1 (85) Yang, J.; Zhang, Y. I-TASSER Server: New Development for Protein Structure and  
2 Function Predictions. *Nucleic Acids Res.* **2015**, *43* (Web Server issue), W174–W181.  
3 <https://doi.org/10.1093/nar/gkv342>.
- 4 (86) Abril, M. A.; Michan, C.; Timmis, K. N.; Ramos, J. L. Regulator and Enzyme  
5 Specificities of the TOL Plasmid-Encoded Upper Pathway for Degradation of Aromatic  
6 Hydrocarbons and Expansion of the Substrate Range of the Pathway. *J. Bacteriol.*  
7 **1989**, *171* (12), 6782–6790. <https://doi.org/10.1128/jb.171.12.6782-6790.1989>.
- 8 (87) Sambrook, J.; Russell, D. W. *Molecular Cloning: A Laboratory Manual*; CSHL Press,  
9 2001.
- 10 (88) Horton, R. M.; Cai, Z.; Ho, S. N.; Pease, L. R. Gene Splicing by Overlap Extension:  
11 Tailor-Made Genes Using the Polymerase Chain Reaction. *BioTechniques* **1990**, *8* (5),  
12 528–535.
- 13 (89) Aparicio, T.; de Lorenzo, V.; Martínez-García, E. Broadening the SEVA Plasmid  
14 Repertoire to Facilitate Genomic Editing of Gram-Negative Bacteria. In *Hydrocarbon*  
15 *and Lipid Microbiology Protocols: Genetic, Genomic and System Analyses of Pure*  
16 *Cultures*; McGenity, T. J., Timmis, K. N., Nogales, B., Eds.; Springer Protocols  
17 Handbooks; Springer: Berlin, Heidelberg, 2017; pp 9–27.  
18 [https://doi.org/10.1007/8623\\_2015\\_102](https://doi.org/10.1007/8623_2015_102).
- 19 (90) Spiridonov, N. A.; Wilson, D. B. Cloning and Biochemical Characterization of BglC, a  
20  $\beta$ -Glucosidase from the Cellulolytic Actinomycete *Thermobifida fusca*. *Curr.*  
21 *Microbiol.* **2001**, *42* (4), 295–301. <https://doi.org/10.1007/s002840110220>.
- 22  
23



1 **Figures**

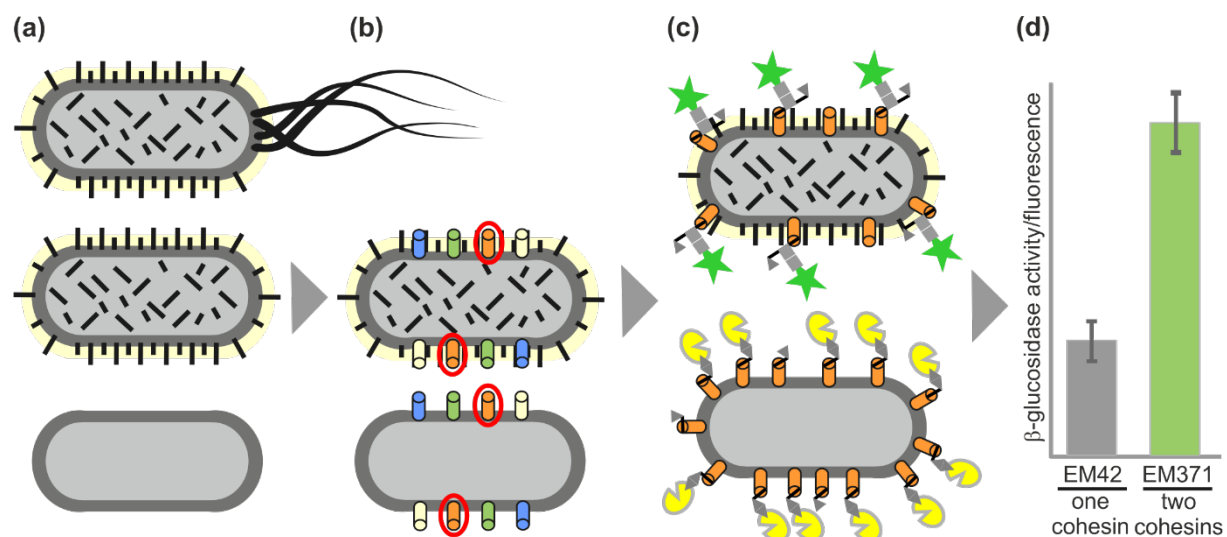

7 **Figure 1 Schematic overview of the actions: Engineering *Pseudomonas putida* for surface**  
8 **display of cohesin-containing designer protein scaffoldins. (a)** Two derivatives of *P.*  
9 *putida* KT2440 (top graphics), strains EM42 and EM371, with streamlined genomes lacking  
10 de-stabilizing genetic elements and certain surface structures, respectively, were employed in  
11 this study. **(b)** Four type V secretion systems were tested in the target host and the best-  
12 performing autotransporter was selected for further work. **(c)+(d)** Single- or two-cohesin  
13 scaffoldins were displayed on EM42 and EM371 surface and the efficiency of the binding of  
14 dockerin-tagged recombinant proteins ( $\beta$ -glucosidase or fluorescent proteins) to the cellular  
15 surface was evaluated and quantified.

1

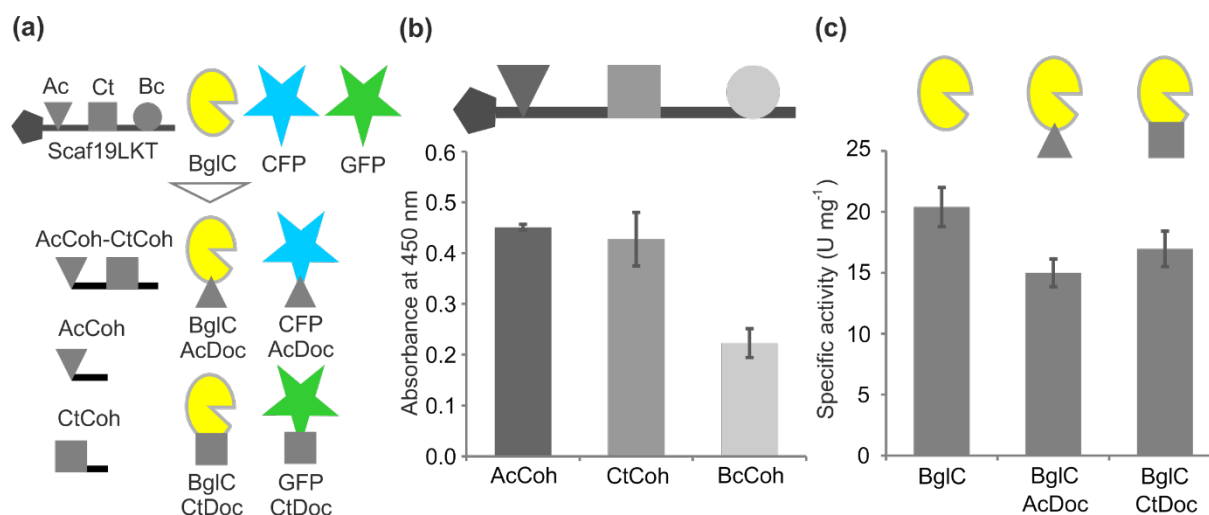

2

3

4 **Figure 2. Recombinant proteins used in this study and initial evaluation of their**

5 **function.** (a) Three truncated variants of synthetic scaffoldin gene *scaf19LKT* (for detailed

6 description see Materials and Methods or work of Vazana and co-authors<sup>47</sup>), codon-optimized

7 for expression in *Pseudomonas putida*, were prepared and adopted for this study: two variants

8 with either single CtCoh (square symbol) or AcCoh (triangle symbol) cohesin from

9 *Clostridium thermocellum* or *Acetivibrio cellulolyticus*, respectively, and a two-cohesin

10 scaffoldin with both AcCoh and CtCoh interconnected with a 29 amino acid-long linker.

11 Furthermore, two chimeric variants of  $\beta$ -glucosidase BglC from *Thermobifida fusca* with

12 CtDoc or AcDoc dockerin matching complimentary cohesins were constructed, as well as a

13 recombinant monomeric superfolder green fluorescent protein (designated here simply as

14 GFP) with CtDoc and mCerulean fluorescent protein (designated here as CFP) with AcDoc.

15 (b) ELISA-based (enzyme-linked immunosorbent assay) verification of proper folding and

16 function of AcCoh, CtCoh, and BcCoh in the Scaf19LKT scaffoldin produced in *P. putida*

17 EM42. Data are shown as mean  $\pm$  SD from two biological replicates, each conducted with two

18 technical replicates. (c) Comparison of activities of purified dockerin-tagged BglC variants

19 produced in *P. putida* EM42 with activity of wild-type BglC. Data are shown as mean  $\pm$  SD

20 from three biological replicates.

21

22

23

1

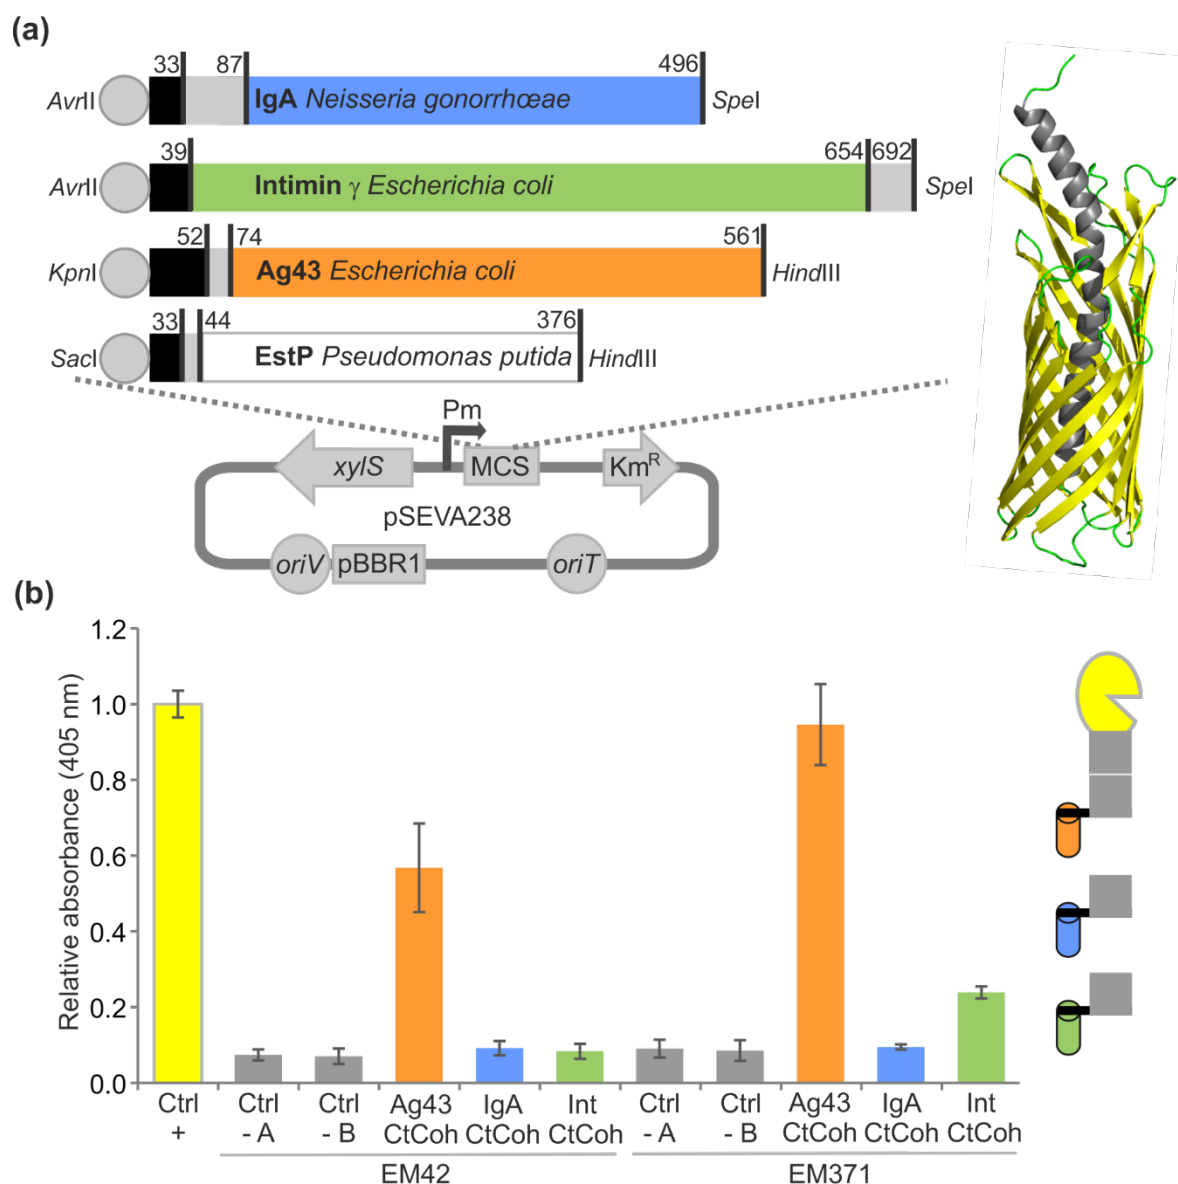

2

3

4 **Figure 3. Selection of the type V secretion system for display of scaffoldins on the**  
5 **surface of *Pseudomonas putida* EM42 and EM371 strains. (a)** Cloning of genes encoding  
6 translocation  $\beta$ -barrel domain and part of the  $\alpha$ -helix passenger (model of EstP  
7 autotransporter prepared by iTasser<sup>85</sup> is shown as a representative example) of four  
8 autotransporter systems from three different Gram-negative bacteria into the marked  
9 restriction sites of the pSEVA238 plasmid polylinker. All four genes were preceded by a  
10 synthetic ribosome binding site (grey sphere) and contained a signal peptide sequence (in  
11 black) and their own multiple cloning site (in grey). The length of the individual segments in  
12 the amino acid sequence of a given autotransporter is shown. **(b)** Test display of CtCoh  
13 cohesin on the surface of EM42 and EM371 strains with three selected secretion systems

1 (Ag43, IgA, and intimin). The cells displaying CtCoh were mixed with purified BglC-CtDoc,  
2 washed and incubated with *p*-nitrophenyl- $\beta$ -D-glucopyranoside substrate. End-point  
3 absorbance of the reaction product *p*-nitrophenol (corresponds to  $\beta$ -glucosidase activity of the  
4 whole cells with anchored BglC) was determined and compared with the absorbance  
5 measured for purified BglC-CtDoc of defined concentration in the reaction mixture (Ctrl+).  
6 EM42 and EM371 cells with empty pSEVA238 plasmid mixed with BglC-CtDoc (Ctrl- A),  
7 and EM42 and EM371 pSEVA238\_ *ag43AT-CtCoh* cells mixed with wild-type BglC (Ctrl- B)  
8 were used as negative controls. Data are shown as mean  $\pm$  SD from at least three independent  
9 experiments, each conducted in two technical replicates.

10  
11  
12  
13  
14  
15  
16  
17  
18  
19  
20  
21  
22  
23  
24

1

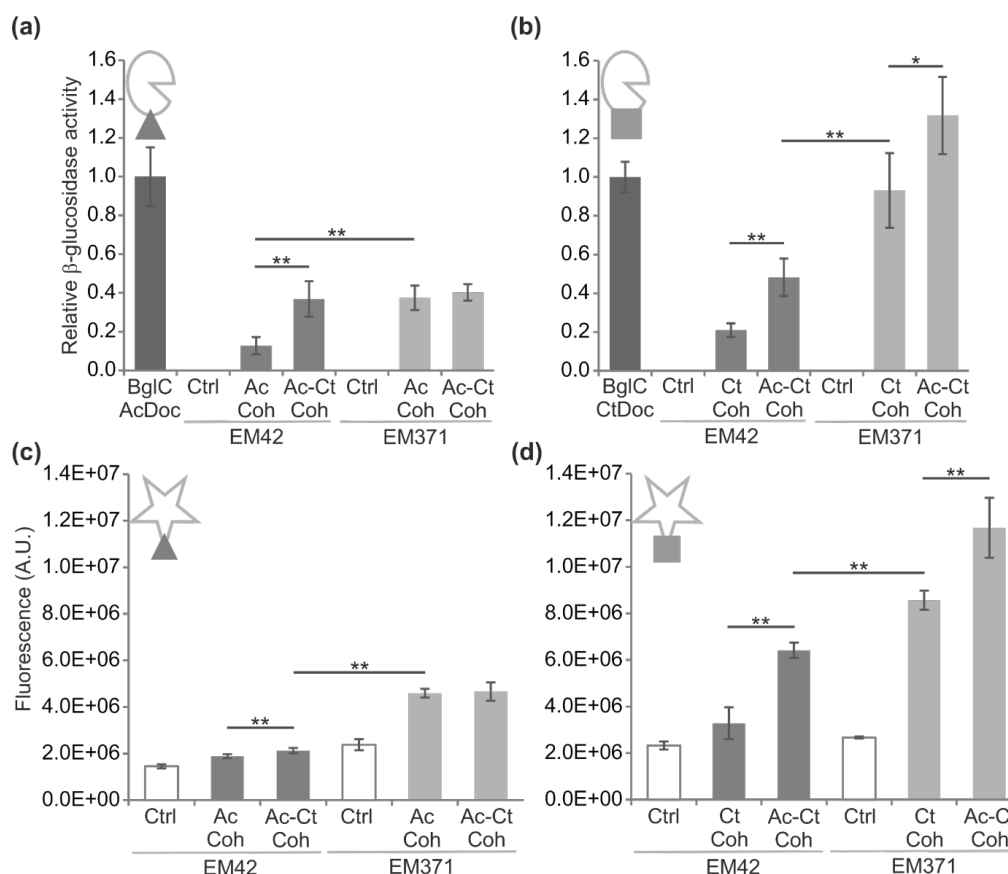

2

3

4 **Figure 4. Binding of dockerin-tagged  $\beta$ -glucosidase and fluorescent proteins on**

5 ***Pseudomonas putida* EM42 and EM371 cells displaying designer scaffoldins. (a) + (b)**

6 Binding of BglC-AcDoc and BglC-CtDoc, respectively, to EM42 and EM371 cells displaying

7 AcCoh, CtCoh, or AcCoh-CtCoh scaffoldins.  $\beta$ -glucosidase activities were measured with

8 whole cells and related to the activity of purified BglC-AcDoc ( $4.64 \pm 0.71$  U) or BglC-CtDoc

9 ( $4.91 \pm 0.39$  U). EM42 and EM371 cells with the pSEVA238b\_ *ag43AT* plasmid were used as

10 controls (Ctrl). Data are shown as mean  $\pm$  SD from at least two independent experiments,

11 each conducted in two to three biological replicates. (c) + (d) Binding of CFP-AcDoc and

12 GFP-CtDoc, respectively, to EM42 and EM371 cells displaying AcCoh, CtCoh, or AcCoh-

13 CtCoh scaffoldins. CFP and GFP fluorescence was measured at 440/500 nm and 475/515 nm,

14 respectively. EM42 and EM371 cells with pSEVA238b\_ *ag43AT* plasmid were used as

15 controls (Ctrl). Data are shown as mean  $\pm$  SD from three biological replicates, each conducted

16 in two technical replicates. Asterisks denote significance in difference in between two means

17 at  $P < 0.05$  (\*) or  $P < 0.01$  (\*\*).

18

19

1

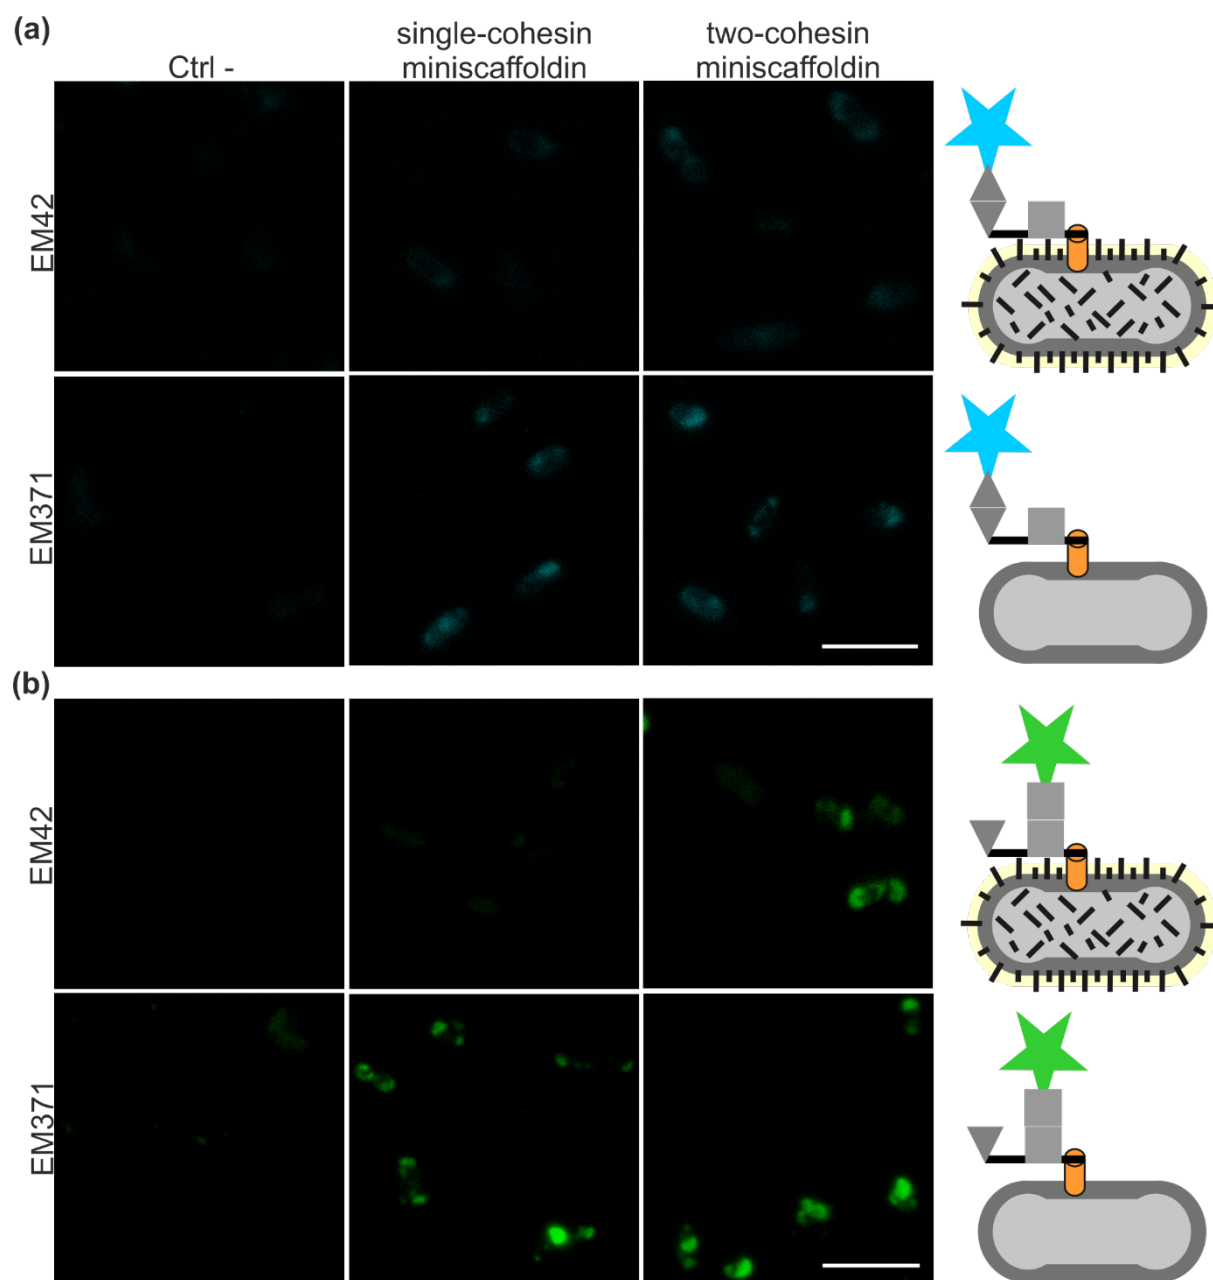

2

3

4 **Figure 5. Confocal microscopy of dockerin-tagged fluorescent proteins bound to the**  
5 ***Pseudomonas putida* EM42 and EM371 cells displaying designer scaffoldins via the Ag43**  
6 **autotransporter. (a) CFP-AcDoc binding to EM42 or EM371 cells displaying AcCoh or**  
7 **AcCoh-CtCoh scaffoldins. Cells with the pSEVA\_ag43AT plasmid were used as a negative**  
8 **control (Ctrl-). (b) GFP-CtDoc binding to EM42 or EM371 cells displaying CtCoh or AcCoh-**  
9 **CtCoh scaffoldins. All figures are in the same scale, the white bar size is 4  $\mu$ m.**

10

11

1

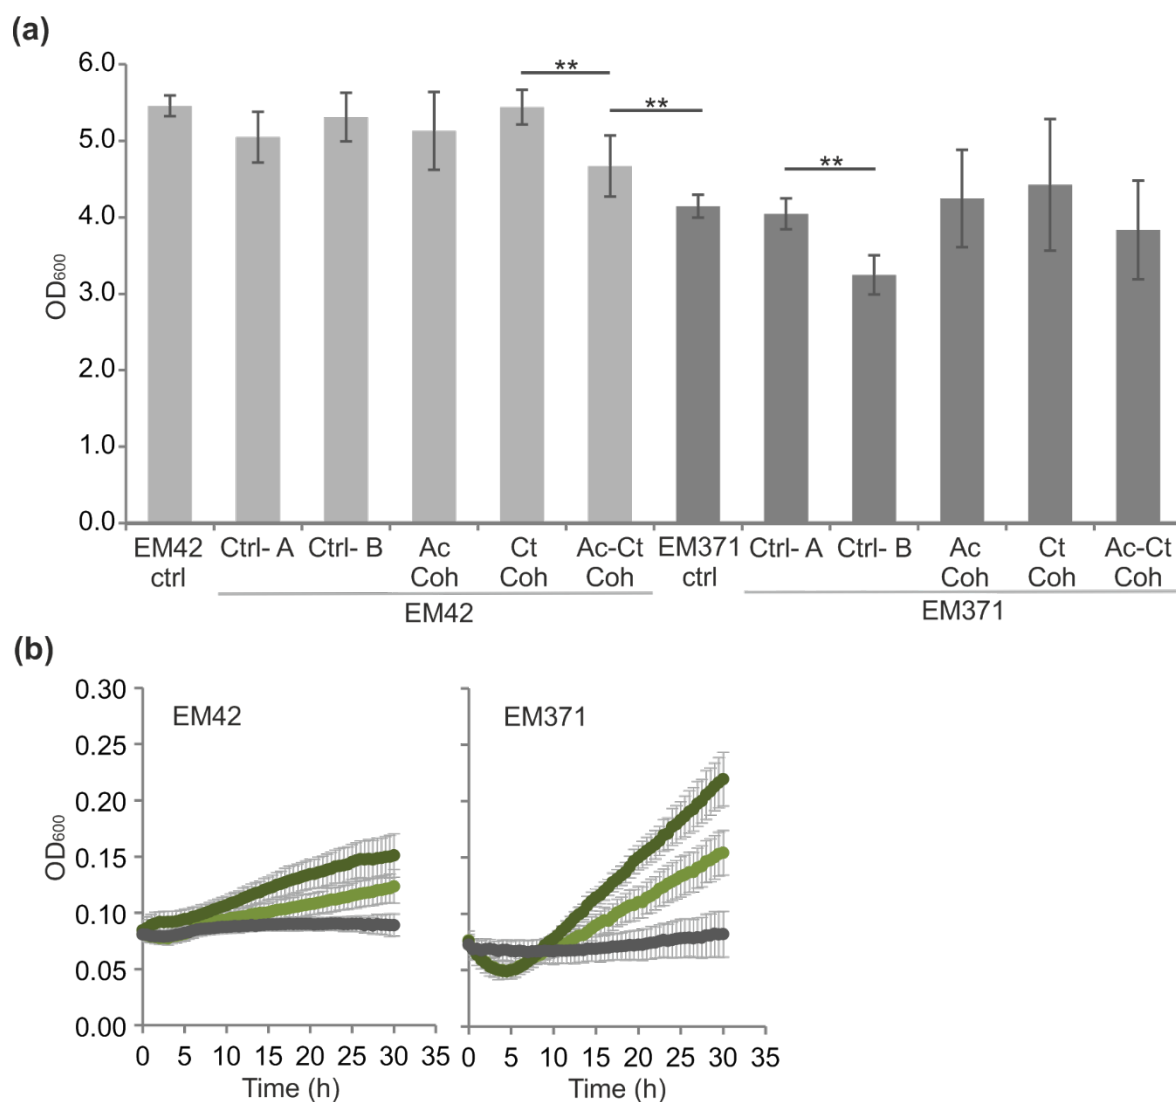

2

3

4 **Figure 6. Viability of *Pseudomonas putida* EM42 and EM371 strains displaying designer**

5 **scaffoldins via the Ag43 autotransporter. (a)** Optical density of *P. putida* cultures measured

6 after 5 h of induction with 0.5 mM 3-methylbenzoate. Used controls were as follows: EM42

7 ctrl and EM371 ctrl, plasmid-free EM42 and EM371 cells; Ctrl- A, cells with empty

8 pSEVA238; Ctrl- B, cells with pSEVA238\_ ag43AT. Data are shown as mean ± SD from at

9 least three independent experiments, each conducted in two biological replicates. Asterisks

10 denote significance in the difference in between two means at P < 0.01 (\*\*). **(b)** Growth of *P.*

11 *putida* recombinants with β-glucosidase molecules attached to the displayed two-cohesin

12 miniscaffoldin in minimal medium with cellobiose. EM42 and EM371 cells with displayed

13 AcCoh-CtCoh were incubated with purified BglC-CtDoc only (pale green line) or with a

14 mixture of BglC-CtDoc and BglC-AcDoc (dark green line) at room temperature for 1 h,

15 washed and grown at 30°C in wells of 96-well microtiter plates containing M9 minimal

1 medium with 5 g L<sup>-1</sup> D-cellobiose used as a sole carbon source. EM42 and EM371 strains  
2 bearing pSEVA238b\_ *ag43AT* plasmid were used as controls (grey line). Error bars show  
3 standard deviations from three biological replicates, each conducted in two technical  
4 replicates.  
5
